# Supplementary material for: Structure, stability and spectral properties of seleno[n]helicenes (n = 1–10)
Source: Royal Society of Chemistry journal article supplement (doi:10.1039/c9nj05001a), 2019-11-28
Supplement: c9nj05001a1.pdf [file c9nj05001a1.pdf]

## Electronic Supplementary Information

### Structure, Stability and Spectral Properties of Seleno[n]helicenes (n=1-10)

Rahul Kumar<sup>a,b</sup> and Dilip Kumar Maity<sup>a,b\*</sup>

<sup>a</sup>Homi Bhabha National Institute, Training School Complex, Anushaktinagar,  
Mumbai-400094, India

<sup>b</sup>Bhabha Atomic Research Centre, Trombay, Mumbai-400085, India

\*Email for correspondence: [dkmaity@barc.gov.in](mailto:dkmaity@barc.gov.in); ORCID ID: 0000-0003-4284-3578

## Table of contents

- 1 Cartesian coordinates for the most stable structures of neutral end substituted seleno[n]helicenes, n=1-10 calculated at B3LYP-D /6-311++G(d,p) level in DCM solvent. S3-S14**
- 2 Cartesian coordinates for the most stable structures of radical cations of end substituted seleno[n]helicenes, n=1-10 calculated at B3LYP-D/6-311++G(d,p) level in DCM solvent. S15-S26**
- 3 Spin density plot with contour cutoff = 0.004 a.u. for the most stable structures of end substituted seleno[n]helicenes radical cation, n=1-10 (S1a-S1j) at B3LYP-D/6-311++G(d,p) level of theory in DCM solvent following ROHF formalism. S27-S28**
- 4 Molecular orbital plots with contour cutoff = 0.02 a.u. for the most stable structure of end substituted seleno[n]helicenes radical cation, n=2,4-6,8-10 (S2a-S2u) at B3LYP-D/6-311++G(d,p) level of theory in DCM solvent. S29-S33**
- 5 Cartesian coordinates for the most stable structures of  $\pi$ -dimer of neutral unsubstituted and end substituted seleno[7]helicene at B3LYP-D /6-311++G(d,p) level in DCM solvent. S34-S36**
- 6 Cartesian coordinates for the most stable structures of  $\pi$ -dimer of unsubstituted and end substituted seleno[7]helicene radical cation at B3LYP-D /6-311++G(d,p) level in DCM solvent. S37-S41**
- 7 Cartesian coordinates for the most stable structures of  $\pi$ -dimer of unsubstituted and end substituted seleno[7]helicene radical cation with two  $\text{PF}_6^-$  counter ions using B3LYP-D /6-311++G(d,p) level of theory in DCM solvent. S42-S46**

1. Cartesian coordinates for the most stable structures of neutral end substituted seleno[n]helicenes, n=1-10 calculated at B3LYP-D /6-311++G(d,p) level in DCM solvent.

### 1.1 Neutral seleno[1]helicene

|    |           |           |           |
|----|-----------|-----------|-----------|
| C  | 0.000000  | 0.000000  | 0.000000  |
| Si | 0.000000  | 0.000000  | 1.880567  |
| C  | 1.752094  | 0.000000  | 2.563715  |
| C  | -0.915931 | -1.540187 | 2.506555  |
| C  | -0.668535 | -2.873834 | 2.337469  |
| Br | 0.841208  | -3.478180 | 1.305741  |
| Se | -2.471311 | -1.369112 | 3.569653  |
| C  | -2.620273 | -3.252161 | 3.671361  |
| Si | -4.039198 | -4.058020 | 4.640966  |
| C  | -5.077085 | -5.100633 | 3.469508  |
| C  | -1.583996 | -3.793446 | 2.963099  |
| Br | -1.372735 | -5.702165 | 2.818545  |
| C  | -0.940778 | 1.498210  | 2.523438  |
| C  | -3.325217 | -5.101069 | 6.033382  |
| C  | -5.080950 | -2.661417 | 5.353116  |
| H  | -4.137854 | -5.525239 | 6.636727  |
| H  | -2.719834 | -5.929055 | 5.651362  |
| H  | -2.695065 | -4.494321 | 6.694153  |
| H  | -5.917914 | -3.080575 | 5.925141  |
| H  | -4.499770 | -2.025990 | 6.031532  |
| H  | -5.501933 | -2.025854 | 4.565322  |
| H  | -5.934812 | -5.524533 | 4.007033  |
| H  | -5.463193 | -4.493688 | 2.642228  |
| H  | -4.501336 | -5.928797 | 3.044472  |
| H  | 0.475709  | 0.915683  | -0.373555 |
| H  | 0.548162  | -0.855901 | -0.406136 |
| H  | -1.023294 | -0.033205 | -0.391947 |
| H  | 2.272861  | 0.915794  | 2.256405  |
| H  | 1.745538  | -0.033463 | 3.659476  |
| H  | 2.329673  | -0.855780 | 2.200339  |
| H  | -0.446080 | 2.417069  | 2.185227  |
| H  | -1.972258 | 1.520250  | 2.152838  |
| H  | -0.970120 | 1.520397  | 3.619079  |

## 1.2 Neutral seleno[2]helicene

|    |           |           |           |
|----|-----------|-----------|-----------|
| C  | 0.000000  | 0.000000  | 0.000000  |
| Si | 0.000000  | 0.000000  | 1.881050  |
| C  | 1.750607  | 0.000000  | 2.569327  |
| C  | -0.941196 | -1.519792 | 2.522307  |
| Se | -2.506035 | -1.248181 | 3.588540  |
| C  | -2.650253 | -3.108328 | 3.686756  |
| Se | -3.879436 | -4.238953 | 4.524248  |
| C  | -2.862382 | -5.703402 | 3.831184  |
| Si | -3.431806 | -7.473177 | 4.219102  |
| C  | -3.844868 | -8.372518 | 2.619441  |
| C  | -1.645607 | -3.783840 | 3.002181  |
| C  | -0.721995 | -2.858735 | 2.372891  |
| Br | 0.802260  | -3.426238 | 1.334235  |
| C  | -1.806979 | -5.221466 | 3.112075  |
| Br | -0.603684 | -6.487944 | 2.292119  |
| C  | -0.920125 | 1.519218  | 2.508000  |
| C  | -2.094209 | -8.372629 | 5.188725  |
| C  | -4.983857 | -7.330156 | 5.276645  |
| H  | -0.408217 | 2.424623  | 2.159228  |
| H  | -1.950353 | 1.556607  | 2.135092  |
| H  | -0.950037 | 1.556583  | 3.603232  |
| H  | 0.473285  | 0.917812  | -0.371698 |
| H  | 0.548147  | -0.853914 | -0.409392 |
| H  | -1.024073 | -0.033227 | -0.390114 |
| H  | 2.269706  | 0.917809  | 2.264861  |
| H  | 1.738960  | -0.033238 | 3.665128  |
| H  | 2.332180  | -0.853908 | 2.208979  |
| H  | -5.348849 | -8.334349 | 5.525299  |
| H  | -4.789869 | -6.805283 | 6.219355  |
| H  | -5.790216 | -6.805219 | 4.751236  |
| H  | -2.453316 | -9.367230 | 5.482578  |
| H  | -1.179950 | -8.502033 | 4.601678  |
| H  | -1.838160 | -7.823008 | 6.102164  |
| H  | -4.249770 | -9.367116 | 2.846083  |
| H  | -4.601279 | -7.822832 | 2.046985  |
| H  | -2.964037 | -8.501919 | 1.983339  |

### 1.3 Neutral seleno[3]helicene

|    |           |           |           |
|----|-----------|-----------|-----------|
| C  | 0.000000  | 0.000000  | 0.000000  |
| Si | 0.000000  | 0.000000  | 1.881687  |
| C  | 1.777235  | 0.000000  | 2.506888  |
| C  | -0.905027 | -1.500201 | 2.566110  |
| C  | -0.809708 | 1.588289  | 2.529214  |
| Se | 0.299519  | 2.922174  | 3.326392  |
| C  | -1.244612 | 3.957449  | 3.506078  |
| Se | -1.452328 | 5.771555  | 3.981032  |
| C  | -3.284259 | 5.455417  | 3.658853  |
| Se | -4.762088 | 6.577572  | 3.871133  |
| C  | -5.848004 | 5.032446  | 3.590951  |
| Si | -7.732473 | 5.211130  | 3.711052  |
| C  | -8.356204 | 4.392842  | 5.286522  |
| C  | -2.101447 | 2.034957  | 2.503028  |
| C  | -2.412742 | 3.315416  | 3.111345  |
| C  | -3.604730 | 4.145044  | 3.322967  |
| C  | -5.041738 | 3.949036  | 3.378793  |
| Br | -5.855221 | 2.202470  | 3.477314  |
| Br | -3.351963 | 1.074358  | 1.391539  |
| C  | -8.101986 | 7.057356  | 3.777008  |
| C  | -8.540901 | 4.464399  | 2.185618  |
| H  | -0.389122 | -2.418472 | 2.257529  |
| H  | -0.926288 | -1.477023 | 3.662015  |
| H  | -1.937144 | -1.554789 | 2.207160  |
| H  | 0.530665  | -0.884866 | -0.374155 |
| H  | -1.015733 | -0.015737 | -0.406786 |
| H  | 0.509560  | 0.889117  | -0.389790 |
| H  | 2.286602  | -0.906908 | 2.158334  |
| H  | 2.343893  | 0.860761  | 2.132462  |
| H  | 1.824027  | 0.008400  | 3.601985  |
| H  | -9.186254 | 7.210252  | 3.843465  |
| H  | -7.647464 | 7.535750  | 4.652651  |
| H  | -7.746724 | 7.576414  | 2.879308  |
| H  | -9.436344 | 4.557029  | 5.391049  |
| H  | -8.175328 | 3.313623  | 5.283445  |
| H  | -7.863133 | 4.818593  | 6.168414  |
| H  | -9.624103 | 4.638655  | 2.215830  |
| H  | -8.150201 | 4.925935  | 1.271105  |
| H  | -8.373287 | 3.385188  | 2.120105  |

#### 1.4 Neutral seleno[4]helicene

|    |           |           |           |
|----|-----------|-----------|-----------|
| C  | 0.000000  | 0.000000  | 0.000000  |
| Si | 0.000000  | 0.000000  | 1.883182  |
| C  | 1.772229  | 0.000000  | 2.516197  |
| C  | -0.949818 | -1.491444 | 2.524306  |
| C  | -0.878924 | 1.584056  | 2.435976  |
| C  | -1.304337 | 2.002891  | 3.663091  |
| Br | -0.652090 | 1.116276  | 5.251162  |
| Se | -1.230723 | 2.966463  | 1.154834  |
| C  | -1.920303 | 3.979020  | 2.573783  |
| C  | -1.981936 | 3.274231  | 3.766084  |
| C  | -2.528202 | 4.047833  | 4.867925  |
| C  | -3.019792 | 3.734266  | 6.198690  |
| C  | -3.574044 | 2.553092  | 6.818128  |
| Br | -4.105833 | 1.044319  | 5.734480  |
| Se | -2.279294 | 5.827674  | 2.764780  |
| C  | -2.596177 | 5.399293  | 4.583331  |
| Se | -2.989478 | 6.490441  | 6.081917  |
| C  | -3.172951 | 4.849658  | 7.007686  |
| Se | -3.790597 | 4.432326  | 8.727729  |
| C  | -3.981939 | 2.624516  | 8.118353  |
| Si | -4.715577 | 1.320222  | 9.279352  |
| C  | -6.466433 | 0.895269  | 8.735828  |
| C  | -3.614050 | -0.204312 | 9.273313  |
| C  | -4.753662 | 2.077811  | 11.003006 |
| H  | -6.916249 | 0.183453  | 9.439821  |
| H  | -7.097085 | 1.791796  | 8.712261  |
| H  | -6.481409 | 0.442983  | 7.739223  |
| H  | -5.175448 | 1.357369  | 11.714671 |
| H  | -3.748472 | 2.342099  | 11.351216 |
| H  | -5.376258 | 2.979876  | 11.038236 |
| H  | -3.999975 | -0.949514 | 9.980561  |
| H  | -3.569426 | -0.668047 | 8.282930  |
| H  | -2.591777 | 0.051717  | 9.575474  |
| H  | -0.479827 | -2.417350 | 2.168958  |
| H  | -0.969714 | -1.519514 | 3.618252  |
| H  | -1.985641 | -1.478134 | 2.165434  |
| H  | 0.503370  | -0.901702 | -0.370082 |
| H  | -1.018678 | 0.003961  | -0.404705 |
| H  | 0.533617  | 0.866948  | -0.407732 |
| H  | 2.302520  | -0.888059 | 2.149092  |
| H  | 2.313204  | 0.886333  | 2.164349  |
| H  | 1.810423  | -0.009428 | 3.610026  |

### 1.5 Neutral seleno[5]helicene

|    |           |           |           |
|----|-----------|-----------|-----------|
| C  | 0.000000  | 0.000000  | 0.000000  |
| Si | 0.000000  | 0.000000  | 1.881167  |
| C  | 1.787633  | 0.000000  | 2.503932  |
| Se | 2.350280  | -1.316312 | 3.778712  |
| C  | 4.025129  | -0.474785 | 3.768095  |
| C  | 4.121392  | 0.542289  | 2.831864  |
| C  | 5.421600  | 1.196041  | 2.812942  |
| C  | 6.070248  | 2.175315  | 1.954740  |
| C  | 7.143686  | 2.797087  | 2.570311  |
| Se | 7.886971  | 4.237022  | 1.589224  |
| C  | 6.660069  | 3.719686  | 0.245597  |
| Se | 6.441742  | 4.264459  | -1.534560 |
| C  | 5.373531  | 2.692526  | -1.784106 |
| Si | 4.664345  | 2.301177  | -3.495060 |
| C  | 2.811755  | 2.010803  | -3.345467 |
| C  | -0.807339 | -1.575188 | 2.524938  |
| C  | -0.914127 | 1.499354  | 2.557920  |
| C  | 2.839726  | 0.822626  | 2.228939  |
| Br | 2.536410  | 2.486061  | 1.299606  |
| Se | 5.499575  | -0.568702 | 4.949386  |
| C  | 6.188089  | 0.862660  | 3.917125  |
| Se | 7.681735  | 1.989114  | 4.193240  |
| C  | 5.911195  | 2.600320  | 0.571860  |
| C  | 5.295001  | 2.022461  | -0.599126 |
| Br | 4.638179  | 0.208560  | -0.567100 |
| C  | 4.994880  | 3.801644  | -4.584466 |
| C  | 5.529414  | 0.794144  | -4.217690 |
| H  | 4.597581  | 3.623155  | -5.591315 |
| H  | 4.512127  | 4.703572  | -4.190505 |
| H  | 6.068222  | 4.003196  | -4.683488 |
| H  | 5.162618  | 0.602214  | -5.234178 |
| H  | 6.612644  | 0.954007  | -4.273630 |
| H  | 5.348856  | -0.102430 | -3.616478 |
| H  | 2.378610  | 1.818576  | -4.335364 |
| H  | 2.588615  | 1.152502  | -2.704313 |
| H  | 2.311916  | 2.889598  | -2.921697 |
| H  | -1.029837 | -0.037083 | -0.377519 |
| H  | 0.477698  | 0.898202  | -0.403221 |
| H  | 0.535657  | -0.873179 | -0.390295 |
| H  | -1.966545 | 1.468837  | 2.247906  |
| H  | -0.884712 | 1.513900  | 3.653819  |

|   |           |           |          |
|---|-----------|-----------|----------|
| H | -0.479797 | 2.435698  | 2.193888 |
| H | -1.849676 | -1.622353 | 2.186179 |
| H | -0.296314 | -2.472701 | 2.157441 |
| H | -0.814014 | -1.609531 | 3.620962 |

### 1.6 Neutral seleno[6]helicene

|    |           |           |          |
|----|-----------|-----------|----------|
| C  | 0.000000  | 0.000000  | 0.000000 |
| Si | 0.000000  | 0.000000  | 1.884148 |
| C  | 1.774082  | 0.000000  | 2.513638 |
| C  | -0.944610 | 1.497957  | 2.512573 |
| C  | -0.862526 | -1.592125 | 2.438883 |
| C  | -1.197123 | -2.066483 | 3.673382 |
| Br | -0.618301 | -1.107193 | 5.239980 |
| Se | -1.286180 | -2.922036 | 1.129720 |
| C  | -1.845200 | -4.005080 | 2.550051 |
| C  | -1.810326 | -3.370753 | 3.781780 |
| C  | -2.263668 | -4.213693 | 4.884293 |
| C  | -2.521724 | -4.022984 | 6.310031 |
| C  | -2.808831 | -2.889967 | 7.187258 |
| C  | -3.329773 | -1.537413 | 7.011770 |
| C  | -4.004757 | -0.828647 | 5.948314 |
| Br | -4.584368 | -1.743742 | 4.355780 |
| Se | -2.244970 | -5.848082 | 2.636633 |
| C  | -2.377717 | -5.539561 | 4.498393 |
| Se | -2.491540 | -6.769529 | 5.925947 |
| C  | -2.484898 | -5.222145 | 7.008050 |
| Se | -2.436161 | -5.044141 | 8.887236 |
| C  | -2.644561 | -3.202803 | 8.527060 |
| Se | -2.812964 | -1.743218 | 9.718791 |
| C  | -3.299045 | -0.778142 | 8.170781 |
| Se | -3.945104 | 0.964027  | 7.946525 |
| C  | -4.393894 | 0.462390  | 6.155151 |
| Si | -5.343005 | 1.689384  | 5.068769 |
| C  | -5.393657 | 3.326568  | 5.999944 |
| C  | -4.451394 | 1.924984  | 3.431515 |
| C  | -7.097658 | 1.060826  | 4.804709 |
| H  | -5.917970 | 3.235979  | 6.958610 |
| H  | -4.386804 | 3.714070  | 6.194755 |
| H  | -5.927743 | 4.074044  | 5.400275 |
| H  | -5.021137 | 2.609863  | 2.790420 |
| H  | -3.458350 | 2.356650  | 3.590119 |
| H  | -4.328252 | 0.979670  | 2.894988 |
| H  | 1.814969  | 0.014663  | 3.607286 |



|   |           |           |           |
|---|-----------|-----------|-----------|
| H | 2.312622  | -0.889121 | 2.165117  |
| H | 2.304888  | 0.885439  | 2.140956  |
| H | -1.951897 | 1.527420  | 2.085803  |
| H | -1.038341 | 1.492660  | 3.602450  |
| H | -0.424164 | 2.418620  | 2.218996  |
| H | 0.483066  | 0.913875  | -0.367492 |
| H | 0.553159  | -0.853666 | -0.409166 |
| H | -1.018084 | -0.024392 | -0.405920 |
| H | -7.109750 | 0.115872  | 4.252560  |
| H | -7.604114 | 0.900725  | 5.763823  |
| H | -7.678280 | 1.796592  | 4.233591  |

### 1.7 Neutral seleno[7]helicene

|    |           |           |           |
|----|-----------|-----------|-----------|
| C  | 0.000000  | 0.000000  | 0.000000  |
| Si | 0.000000  | 0.000000  | 1.878697  |
| C  | 1.776712  | 0.000000  | 2.506642  |
| C  | -0.793100 | -1.602748 | 2.492641  |
| Se | 0.158453  | -2.686159 | 3.745862  |
| C  | -1.311900 | -3.837635 | 3.721239  |
| C  | -2.299845 | -3.467684 | 2.820544  |
| C  | -1.999882 | -2.185490 | 2.227336  |
| Br | -3.376368 | -1.140506 | 1.372511  |
| Se | -1.768609 | -5.299126 | 4.821464  |
| C  | -3.384629 | -5.290826 | 3.841260  |
| Se | -4.954166 | -6.307731 | 4.086356  |
| C  | -5.545555 | -5.406979 | 2.537787  |
| Se | -7.236107 | -5.414773 | 1.699487  |
| C  | -6.386694 | -4.324189 | 0.415000  |
| Se | -7.093303 | -3.473262 | -1.113328 |
| C  | -5.292436 | -3.032707 | -1.460315 |
| Se | -4.543250 | -2.001648 | -2.856030 |
| C  | -2.894658 | -2.552752 | -2.125651 |
| Se | -1.139725 | -2.309531 | -2.716835 |
| C  | -0.619939 | -3.579649 | -1.387768 |
| Si | 1.204699  | -4.050518 | -1.233759 |
| C  | 1.475816  | -5.822054 | -1.807598 |
| C  | -3.428955 | -4.392305 | 2.788109  |
| C  | -4.596964 | -4.592876 | 1.934629  |
| C  | -5.025349 | -4.139361 | 0.612414  |
| C  | -4.379003 | -3.555332 | -0.559785 |
| C  | -3.006588 | -3.398194 | -1.031650 |
| C  | -1.732251 | -3.999588 | -0.714963 |
| Br | -1.627595 | -5.594546 | 0.363270  |

|   |           |           |           |
|---|-----------|-----------|-----------|
| C | -0.918249 | 1.491721  | 2.566244  |
| C | 1.746853  | -3.815955 | 0.549653  |
| C | 2.164611  | -2.867335 | -2.342660 |
| H | 1.825751  | -0.005571 | 3.602045  |
| H | 2.332227  | -0.868735 | 2.134334  |
| H | 2.293378  | 0.902344  | 2.156958  |
| H | 0.450849  | 0.925856  | -0.379849 |
| H | 0.580495  | -0.844087 | -0.385201 |
| H | -1.012680 | -0.077656 | -0.404958 |
| H | 0.950858  | -6.538018 | -1.167507 |
| H | 1.118908  | -5.959495 | -2.835132 |
| H | 2.545964  | -6.064831 | -1.785347 |
| H | 1.631447  | -2.770735 | 0.853027  |
| H | 1.158167  | -4.430646 | 1.236054  |
| H | 2.803468  | -4.089996 | 0.664651  |
| H | 3.238099  | -3.082105 | -2.272357 |
| H | 1.876064  | -2.965424 | -3.395971 |
| H | 2.011956  | -1.824386 | -2.041222 |
| H | -1.948506 | 1.535238  | 2.199395  |
| H | -0.948602 | 1.461686  | 3.661814  |
| H | -0.409736 | 2.417088  | 2.266639  |

### 1.8 Neutral seleno[8]helicene

|    |           |           |          |
|----|-----------|-----------|----------|
| C  | 0.000000  | 0.000000  | 0.000000 |
| Si | 0.000000  | 0.000000  | 1.884895 |
| C  | 1.772938  | 0.000000  | 2.520432 |
| C  | -0.832842 | -1.607632 | 2.433478 |
| C  | -1.181517 | -2.103027 | 3.655596 |
| Br | -0.695456 | -1.130362 | 5.246828 |
| C  | -1.670818 | -3.460842 | 3.748424 |
| C  | -2.089886 | -4.338696 | 4.835915 |
| C  | -2.603687 | -4.166973 | 6.194326 |
| C  | -3.162296 | -3.068640 | 6.987431 |
| C  | -3.635065 | -1.705302 | 6.732091 |
| C  | -3.941308 | -0.892769 | 5.555330 |
| C  | -4.154871 | -1.136106 | 4.132634 |
| C  | -4.571365 | -2.269091 | 3.336034 |
| Br | -5.257131 | -3.858241 | 4.183782 |
| C  | -1.548210 | -4.112872 | 2.530925 |
| Se | -1.678959 | -5.987928 | 2.638665 |
| C  | -1.997368 | -5.672594 | 4.470546 |

|    |           |           |           |
|----|-----------|-----------|-----------|
| Se | -2.279153 | -6.906998 | 5.863164  |
| C  | -2.605610 | -5.365070 | 6.895848  |
| Se | -2.997946 | -5.227611 | 8.732281  |
| C  | -3.272233 | -3.408177 | 8.330215  |
| Se | -3.674940 | -1.985216 | 9.496506  |
| C  | -3.786773 | -0.981752 | 7.907209  |
| Se | -4.010777 | 0.876404  | 7.688972  |
| C  | -4.028306 | 0.457913  | 5.854008  |
| Se | -4.074709 | 1.613008  | 4.363972  |
| C  | -4.114868 | 0.017730  | 3.364961  |
| Se | -4.364055 | -0.284497 | 1.538931  |
| C  | -4.709478 | -2.114780 | 1.987865  |
| Si | -5.385797 | -3.239241 | 0.625066  |
| C  | -5.097688 | -2.349013 | -1.011183 |
| Se | -1.034609 | -2.994022 | 1.126572  |
| C  | -0.918688 | 1.517192  | 2.499796  |
| C  | -4.513833 | -4.901122 | 0.582726  |
| C  | -7.233697 | -3.471026 | 0.905718  |
| H  | -5.630128 | -1.391805 | -1.059275 |
| H  | -4.031835 | -2.157962 | -1.182480 |
| H  | -5.462492 | -2.971983 | -1.837194 |
| H  | -4.979777 | -5.532082 | -0.185452 |
| H  | -3.455752 | -4.781711 | 0.329948  |
| H  | -4.578670 | -5.424911 | 1.539427  |
| H  | 1.805045  | 0.004982  | 3.614939  |
| H  | 2.314413  | -0.886244 | 2.169289  |
| H  | 2.305779  | 0.889287  | 2.160152  |
| H  | -1.920264 | 1.572427  | 2.062205  |
| H  | -1.021174 | 1.524045  | 3.587588  |
| H  | -0.365444 | 2.417572  | 2.202231  |
| H  | 0.462499  | 0.924570  | -0.367061 |
| H  | 0.570055  | -0.840818 | -0.412450 |
| H  | -1.018961 | -0.046063 | -0.401851 |
| H  | -7.432476 | -3.991106 | 1.848588  |
| H  | -7.749052 | -2.503878 | 0.936653  |
| H  | -7.670384 | -4.063420 | 0.091515  |

### 1.9 Neutral seleno[9]helicene

|    |           |           |          |
|----|-----------|-----------|----------|
| C  | 0.000000  | 0.000000  | 0.000000 |
| Si | 0.000000  | 0.000000  | 1.890568 |
| C  | 1.784573  | 0.000000  | 2.491455 |
| C  | -0.919319 | -1.529285 | 2.500536 |

|    |           |           |          |
|----|-----------|-----------|----------|
| C  | -0.917281 | 1.563547  | 2.451035 |
| Se | -1.894728 | 2.550820  | 1.135850 |
| C  | -2.546349 | 3.594649  | 2.540372 |
| Se | -4.031331 | 4.752390  | 2.622906 |
| C  | -3.693727 | 4.755382  | 4.479907 |
| Se | -4.761373 | 5.395936  | 5.893436 |
| C  | -3.379944 | 4.731036  | 6.986779 |
| Se | -3.237813 | 4.698282  | 8.864372 |
| C  | -1.497646 | 4.059204  | 8.527863 |
| Se | -0.156782 | 3.516199  | 9.734664 |
| C  | 0.915563  | 3.408908  | 8.189443 |
| Se | 2.668091  | 2.749771  | 7.979622 |
| C  | 2.452477  | 3.297513  | 6.190733 |
| Se | 3.582376  | 3.040737  | 4.706409 |
| C  | 2.286886  | 4.051028  | 3.784857 |
| Se | 2.267977  | 4.632297  | 1.989245 |
| C  | 0.829329  | 5.714812  | 2.546740 |
| Se | -0.044077 | 7.118483  | 1.678550 |
| C  | -0.725910 | 7.626204  | 3.392378 |
| C  | -0.280684 | 6.734604  | 4.326298 |
| Br | -0.474114 | 7.159892  | 6.190944 |
| C  | -1.151449 | 2.112815  | 3.679395 |
| C  | -1.991620 | 3.288718  | 3.774696 |
| C  | -2.551029 | 4.077606  | 4.874494 |
| C  | -2.279311 | 4.235788  | 6.304378 |
| C  | -1.133377 | 4.029263  | 7.191227 |
| C  | 0.306858  | 3.835513  | 7.020001 |
| C  | 1.258225  | 3.944692  | 5.913070 |
| C  | 1.259929  | 4.541023  | 4.575987 |
| C  | 0.526887  | 5.611594  | 3.896748 |
| Br | -0.622488 | 1.143211  | 5.252682 |
| Si | -1.685212 | 9.258202  | 3.520980 |
| C  | -0.621979 | 10.554089 | 4.384769 |
| C  | -2.041794 | 9.836898  | 1.756839 |
| C  | -3.323572 | 9.021020  | 4.418359 |
| H  | -1.128618 | 10.038067 | 1.188945 |
| H  | -2.639365 | 9.111520  | 1.197061 |
| H  | -2.611453 | 10.771198 | 1.791013 |
| H  | -3.863068 | 9.973074  | 4.463499 |
| H  | -3.955498 | 8.301518  | 3.890986 |
| H  | -3.185696 | 8.661086  | 5.439340 |
| H  | -0.943533 | -1.578910 | 3.591110 |
| H  | -1.952139 | -1.534547 | 2.140729 |
| H  | -0.429850 | -2.436477 | 2.130719 |
| H  | 2.326849  | 0.864985  | 2.100465 |

|   |           |           |           |
|---|-----------|-----------|-----------|
| H | 1.852632  | 0.025713  | 3.580341  |
| H | 2.294214  | -0.903559 | 2.140240  |
| H | 0.537978  | -0.882314 | -0.361524 |
| H | -1.009464 | -0.045153 | -0.419296 |
| H | 0.502435  | 0.879547  | -0.413001 |
| H | -0.390696 | 10.268111 | 5.412935  |
| H | 0.323953  | 10.700290 | 3.855581  |
| H | -1.145242 | 11.515810 | 4.409970  |

### 1.10 Neutral seleno[10]helicene

|    |           |            |           |
|----|-----------|------------|-----------|
| C  | 0.000000  | 0.000000   | 0.000000  |
| Si | 0.000000  | 0.000000   | 1.882495  |
| C  | 1.789379  | 0.000000   | 2.481526  |
| C  | -0.828998 | -1.561329  | 2.579715  |
| C  | -2.051190 | -2.138744  | 2.381750  |
| Br | -3.369470 | -1.198099  | 1.336725  |
| Se | 0.076768  | -2.504370  | 3.979159  |
| C  | -1.446623 | -3.575126  | 4.115262  |
| Se | -2.001628 | -4.742369  | 5.485321  |
| C  | -3.613830 | -4.817744  | 4.507512  |
| Se | -5.275506 | -5.550066  | 5.007315  |
| C  | -5.842840 | -4.914744  | 3.326954  |
| Se | -7.568999 | -4.880304  | 2.572440  |
| C  | -6.680873 | -4.194340  | 1.059188  |
| Se | -7.386577 | -3.643859  | -0.599275 |
| C  | -5.574124 | -3.484848  | -1.092444 |
| Se | -4.815314 | -2.834771  | -2.690913 |
| C  | -3.189341 | -3.371064  | -1.903413 |
| Se | -1.421863 | -3.094910  | -2.494191 |
| C  | -0.961594 | -4.079505  | -0.955083 |
| Se | 0.737279  | -4.500398  | -0.258085 |
| C  | -0.237452 | -5.552906  | 0.962327  |
| Se | 0.396379  | -6.675109  | 2.340702  |
| C  | -1.389379 | -7.268745  | 2.419629  |
| Se | -2.152035 | -8.694125  | 3.353659  |
| C  | -3.673868 | -8.505788  | 2.206176  |
| Si | -5.046496 | -9.813837  | 2.332702  |
| C  | -4.938570 | -10.993903 | 0.866094  |
| C  | -2.412415 | -3.311050  | 3.153928  |
| C  | -3.609393 | -4.145432  | 3.294434  |
| C  | -4.842685 | -4.368077  | 2.534254  |
| C  | -5.299411 | -4.140241  | 1.160815  |

|    |           |            |           |
|----|-----------|------------|-----------|
| C  | -4.664304 | -3.908945  | -0.138021 |
| C  | -3.308470 | -4.013578  | -0.680782 |
| C  | -2.036160 | -4.591560  | -0.240341 |
| C  | -1.606649 | -5.589163  | 0.743905  |
| C  | -2.233528 | -6.689259  | 1.482482  |
| C  | -3.453475 | -7.461378  | 1.353627  |
| Br | -4.597012 | -7.254532  | -0.183998 |
| C  | -0.867305 | 1.534382   | 2.552270  |
| C  | -6.750571 | -9.019599  | 2.428254  |
| C  | -4.749128 | -10.786969 | 3.921816  |
| H  | 1.867513  | 0.041161   | 3.572643  |
| H  | 2.340875  | -0.878353  | 2.131586  |
| H  | 2.298833  | 0.886217   | 2.086644  |
| H  | 0.538834  | 0.883364   | -0.362014 |
| H  | 0.506862  | -0.886156  | -0.393022 |
| H  | -1.008124 | 0.027321   | -0.418867 |
| H  | -5.129930 | -10.488779 | -0.084270 |
| H  | -3.949409 | -11.459328 | 0.807597  |
| H  | -5.679798 | -11.793794 | 0.976278  |
| H  | -6.819256 | -8.338080  | 3.281170  |
| H  | -7.002638 | -8.459067  | 1.525602  |
| H  | -7.507462 | -9.801368  | 2.561215  |
| H  | -5.532806 | -11.545429 | 4.028783  |
| H  | -3.788652 | -11.312156 | 3.919759  |
| H  | -4.788104 | -10.147846 | 4.809574  |
| H  | -1.904565 | 1.602163   | 2.213939  |
| H  | -0.868517 | 1.539270   | 3.647010  |
| H  | -0.344082 | 2.435871   | 2.213244  |

2 Cartesian coordinates for the most stable structures of radical cations of end substituted seleno[n]helicenes, n=1-10 calculated at B3LYP-D/6-311++G(d,p) level in DCM solvent.

### 2.1 Seleno[1]helicene radical cation

|    |           |           |           |
|----|-----------|-----------|-----------|
| C  | 0.000000  | 0.000000  | 0.000000  |
| Si | 0.000000  | 0.000000  | 1.867536  |
| C  | 1.749951  | 0.000000  | 2.518545  |
| C  | -0.951402 | -1.529199 | 2.515045  |
| C  | -0.728175 | -2.905830 | 2.354750  |
| Br | 0.722770  | -3.596405 | 1.369937  |
| Se | -2.472250 | -1.298126 | 3.548672  |
| C  | -2.727293 | -3.167229 | 3.712052  |
| Si | -4.193512 | -3.855800 | 4.724104  |
| C  | -5.316896 | -4.879464 | 3.639949  |
| C  | -1.690997 | -3.810973 | 3.002572  |
| Br | -1.512960 | -5.695395 | 2.875754  |
| C  | -0.902123 | 1.504154  | 2.497233  |
| C  | -3.555756 | -4.877177 | 6.151058  |
| C  | -5.131989 | -2.383830 | 5.376252  |
| H  | -4.426665 | -5.220886 | 6.724387  |
| H  | -3.000593 | -5.760247 | 5.826311  |
| H  | -2.917287 | -4.292434 | 6.822680  |
| H  | -5.971262 | -2.796641 | 5.959317  |
| H  | -4.551420 | -1.749973 | 6.055288  |
| H  | -5.565554 | -1.751703 | 4.593656  |
| H  | -6.149303 | -5.221282 | 4.269067  |
| H  | -5.736315 | -4.299191 | 2.810744  |
| H  | -4.824762 | -5.763810 | 3.229465  |
| H  | 0.518912  | 0.910410  | -0.327070 |
| H  | 0.529341  | -0.855308 | -0.426506 |
| H  | -1.015159 | 0.022135  | -0.411857 |
| H  | 2.233672  | 0.911042  | 2.142727  |
| H  | 1.786153  | 0.024962  | 3.613264  |
| H  | 2.335831  | -0.854097 | 2.171416  |
| H  | -0.342817 | 2.372519  | 2.112910  |
| H  | -1.928979 | 1.594677  | 2.126846  |
| H  | -0.915441 | 1.588830  | 3.589337  |

## 2.2 Seleno[2]helicene radical cation

|    |           |           |           |
|----|-----------|-----------|-----------|
| C  | 0.000000  | 0.000000  | 0.000000  |
| Si | 0.000000  | 0.000000  | 1.876291  |
| C  | 1.731000  | 0.000000  | 2.600242  |
| C  | -0.916624 | -1.572884 | 2.486526  |
| Se | -2.467409 | -1.382738 | 3.518823  |
| C  | -2.576919 | -3.238396 | 3.591764  |
| Se | -3.776650 | -4.414679 | 4.390380  |
| C  | -2.754074 | -5.828134 | 3.709790  |
| Si | -3.296503 | -7.634210 | 4.070918  |
| C  | -3.663388 | -8.484278 | 2.438972  |
| C  | -1.553408 | -3.876201 | 2.910493  |
| C  | -0.646667 | -2.923792 | 2.306907  |
| Br | 0.876590  | -3.421592 | 1.293015  |
| C  | -1.679312 | -5.315192 | 2.994335  |
| Br | -0.463264 | -6.524391 | 2.184919  |
| C  | -0.987972 | 1.455503  | 2.534001  |
| C  | -1.932592 | -8.484153 | 5.039324  |
| C  | -4.856040 | -7.502194 | 5.108983  |
| H  | -0.507526 | 2.388073  | 2.214146  |
| H  | -2.014314 | 1.464440  | 2.148859  |
| H  | -1.028627 | 1.464452  | 3.629473  |
| H  | 0.419528  | 0.948409  | -0.358667 |
| H  | 0.601085  | -0.812236 | -0.419042 |
| H  | -1.019250 | -0.086983 | -0.393290 |
| H  | 2.223784  | 0.948389  | 2.351545  |
| H  | 1.700566  | -0.086933 | 3.692318  |
| H  | 2.349493  | -0.812261 | 2.207399  |
| H  | -5.213949 | -8.511129 | 5.347257  |
| H  | -4.676613 | -6.983370 | 6.057888  |
| H  | -5.662195 | -6.983430 | 4.577205  |
| H  | -2.278661 | -9.478344 | 5.349075  |
| H  | -1.019904 | -8.615238 | 4.450732  |
| H  | -1.681346 | -7.918603 | 5.943836  |
| H  | -4.082666 | -9.478475 | 2.638733  |
| H  | -4.400857 | -7.918800 | 1.858037  |
| H  | -2.768125 | -8.615349 | 1.824194  |



### 2.3 Seleno[3]helicene radical cation

|    |           |            |           |
|----|-----------|------------|-----------|
| C  | 0.000000  | 0.000000   | 0.000000  |
| Si | 0.000000  | 0.000000   | 1.877879  |
| C  | 1.734389  | 0.000000   | 2.595755  |
| C  | -0.903557 | -1.571928  | 2.497667  |
| C  | -0.541944 | -2.916268  | 2.438258  |
| Br | 0.886011  | -3.410878  | 1.276144  |
| C  | -0.986711 | 1.458624   | 2.531429  |
| C  | -1.389294 | -3.868578  | 3.079655  |
| C  | -2.562357 | -3.260796  | 3.530282  |
| Se | -3.920126 | -4.455049  | 3.980196  |
| C  | -2.685552 | -5.796099  | 3.593401  |
| C  | -1.415143 | -5.326684  | 3.255392  |
| C  | -0.455633 | -6.381312  | 3.313626  |
| Br | 1.423399  | -6.073983  | 3.408412  |
| C  | -0.919238 | -7.678919  | 3.520583  |
| Si | 0.009616  | -9.354608  | 3.548997  |
| C  | -1.315885 | -10.682302 | 3.641678  |
| Se | -2.770004 | -7.654567  | 3.823205  |
| C  | 0.989279  | -9.508282  | 1.955229  |
| C  | 1.104171  | -9.416593  | 5.073643  |
| Se | -2.574349 | -1.396875  | 3.331555  |
| H  | 2.235459  | 0.940923   | 2.335887  |
| H  | 1.706749  | -0.076226  | 3.688717  |
| H  | 2.342900  | -0.822865  | 2.209333  |
| H  | 0.397319  | 0.957103   | -0.360856 |
| H  | 0.619356  | -0.800996  | -0.413965 |
| H  | -1.016868 | -0.112288  | -0.393183 |
| H  | -0.507910 | 2.390452   | 2.206820  |
| H  | -2.013395 | 1.466289   | 2.147171  |
| H  | -1.025772 | 1.469518   | 3.626581  |
| H  | -0.836015 | -11.668414 | 3.656922  |
| H  | -1.920309 | -10.597587 | 4.552331  |
| H  | -1.986817 | -10.653011 | 2.775657  |
| H  | 1.536902  | -10.420696 | 5.166620  |
| H  | 1.926631  | -8.697226  | 5.022311  |
| H  | 0.525125  | -9.213942  | 5.981860  |
| H  | 1.448404  | -10.503592 | 1.905187  |
| H  | 0.337745  | -9.393539  | 1.081457  |
| H  | 1.789213  | -8.765192  | 1.887139  |

## 2.4 Seleno[4]helicene radical cation

|    |           |           |           |
|----|-----------|-----------|-----------|
| C  | 0.000000  | 0.000000  | 0.000000  |
| Si | 0.000000  | 0.000000  | 1.879685  |
| C  | 1.760241  | 0.000000  | 2.535677  |
| C  | -0.996032 | -1.448904 | 2.538660  |
| C  | -0.862264 | 1.613216  | 2.415502  |
| C  | -1.288287 | 2.049893  | 3.631773  |
| Br | -0.688216 | 1.182103  | 5.235489  |
| Se | -1.188917 | 2.994822  | 1.114663  |
| C  | -1.854089 | 4.030557  | 2.488356  |
| C  | -1.940328 | 3.344214  | 3.699368  |
| C  | -2.534027 | 4.119357  | 4.740616  |
| C  | -3.086730 | 3.849750  | 6.028776  |
| C  | -3.641961 | 2.677774  | 6.679262  |
| Br | -4.147745 | 1.142772  | 5.643405  |
| Se | -2.262439 | 5.890469  | 2.612163  |
| C  | -2.588827 | 5.515326  | 4.410701  |
| Se | -2.973659 | 6.629487  | 5.857266  |
| C  | -3.244941 | 4.996516  | 6.806560  |
| Se | -3.855397 | 4.637903  | 8.509784  |
| C  | -4.055731 | 2.800542  | 7.969695  |
| Si | -4.805143 | 1.537968  | 9.185158  |
| C  | -6.548754 | 1.114090  | 8.629353  |
| C  | -3.692902 | 0.025715  | 9.225982  |
| C  | -4.838121 | 2.378200  | 10.866272 |
| H  | -7.016686 | 0.440884  | 9.358661  |
| H  | -7.167964 | 2.015667  | 8.556559  |
| H  | -6.556566 | 0.614665  | 7.655491  |
| H  | -5.253646 | 1.690808  | 11.613097 |
| H  | -3.832373 | 2.661474  | 11.197773 |
| H  | -5.465141 | 3.277851  | 10.861952 |
| H  | -4.065024 | -0.686154 | 9.973451  |
| H  | -3.660567 | -0.486725 | 8.259612  |
| H  | -2.668419 | 0.300998  | 9.502011  |
| H  | -0.559046 | -2.389994 | 2.181822  |
| H  | -1.007183 | -1.476156 | 3.632572  |
| H  | -2.033125 | -1.402930 | 2.186714  |
| H  | 0.478426  | -0.915772 | -0.367951 |
| H  | -1.018031 | 0.029701  | -0.405461 |
| H  | 0.558349  | 0.850455  | -0.409287 |
| H  | 2.289576  | -0.891394 | 2.176125  |
| H  | 2.309450  | 0.882214  | 2.186924  |
| H  | 1.788009  | -0.009305 | 3.629768  |

## 2.5 Seleno[5]helicene radical cation

|    |           |           |           |
|----|-----------|-----------|-----------|
| C  | 0.000000  | 0.000000  | 0.000000  |
| Si | 0.000000  | 0.000000  | 1.878788  |
| C  | 1.805857  | 0.000000  | 2.479062  |
| Se | 2.394669  | -1.322124 | 3.720602  |
| C  | 4.064310  | -0.504727 | 3.675378  |
| C  | 4.139288  | 0.531271  | 2.763349  |
| C  | 5.437259  | 1.175703  | 2.735670  |
| C  | 6.100488  | 2.073830  | 1.863991  |
| C  | 7.229461  | 2.682211  | 2.469477  |
| Se | 7.911131  | 4.128924  | 1.524877  |
| C  | 6.647834  | 3.645675  | 0.184229  |
| Se | 6.409907  | 4.212206  | -1.570856 |
| C  | 5.320480  | 2.669396  | -1.833581 |
| Si | 4.551650  | 2.330808  | -3.541124 |
| C  | 2.701796  | 2.087498  | -3.320481 |
| C  | -0.784523 | -1.575616 | 2.540763  |
| C  | -0.886453 | 1.504219  | 2.573982  |
| C  | 2.853244  | 0.829905  | 2.185428  |
| Br | 2.547174  | 2.494458  | 1.278992  |
| Se | 5.578501  | -0.622727 | 4.824327  |
| C  | 6.232450  | 0.820357  | 3.854904  |
| Se | 7.772744  | 1.888317  | 4.096016  |
| C  | 5.906875  | 2.522106  | 0.499313  |
| C  | 5.254390  | 1.968541  | -0.660381 |
| Br | 4.572165  | 0.174054  | -0.639703 |
| C  | 4.898515  | 3.848911  | -4.595306 |
| C  | 5.366208  | 0.817173  | -4.300846 |
| H  | 4.471794  | 3.707637  | -5.595832 |
| H  | 4.450535  | 4.753272  | -4.167303 |
| H  | 5.974496  | 4.022167  | -4.717131 |
| H  | 4.974446  | 0.655551  | -5.313096 |
| H  | 6.451534  | 0.951532  | -4.376716 |
| H  | 5.173963  | -0.087365 | -3.715648 |
| H  | 2.223192  | 1.950359  | -4.298269 |
| H  | 2.477752  | 1.208561  | -2.708333 |
| H  | 2.246802  | 2.961318  | -2.840072 |
| H  | -1.029652 | -0.061183 | -0.374181 |
| H  | 0.453732  | 0.909115  | -0.406310 |
| H  | 0.554421  | -0.860768 | -0.391243 |
| H  | -1.945033 | 1.475117  | 2.286215  |
| H  | -0.834892 | 1.519412  | 3.668904  |

|   |           |           |          |
|---|-----------|-----------|----------|
| H | -0.459830 | 2.439554  | 2.198821 |
| H | -1.832066 | -1.628214 | 2.219843 |
| H | -0.276606 | -2.472114 | 2.166530 |
| H | -0.773502 | -1.605880 | 3.636920 |

## 2.6 Seleno[6]helicene radical cation

|    |           |           |          |
|----|-----------|-----------|----------|
| C  | 0.000000  | 0.000000  | 0.000000 |
| Si | 0.000000  | 0.000000  | 1.881850 |
| C  | 1.764577  | 0.000000  | 2.522221 |
| C  | -0.873893 | 1.597467  | 2.432209 |
| Se | -1.739002 | 2.677494  | 1.122437 |
| C  | -2.330216 | 3.749370  | 2.532421 |
| Se | -3.661402 | 5.088017  | 2.627057 |
| C  | -3.371647 | 5.020689  | 4.464094 |
| Se | -4.321009 | 5.855845  | 5.886780 |
| C  | -3.058867 | 5.004894  | 6.966874 |
| Se | -2.945422 | 4.866397  | 8.825401 |
| C  | -1.251068 | 4.079600  | 8.460881 |
| Se | 0.034536  | 3.409469  | 9.626188 |
| C  | 1.120898  | 3.261608  | 8.085691 |
| Se | 2.934087  | 2.869887  | 7.873108 |
| C  | 2.766035  | 3.514865  | 6.088253 |
| Si | 4.322880  | 3.636666  | 5.002435 |
| C  | 4.026158  | 2.756060  | 3.371508 |
| C  | 0.512515  | 3.711310  | 6.926677 |
| C  | 1.470222  | 3.894989  | 5.868212 |
| Br | 1.015028  | 4.871699  | 4.278013 |
| C  | -0.897695 | 4.037238  | 7.109386 |
| C  | -2.001102 | 4.355158  | 6.251886 |
| C  | -2.318260 | 4.194817  | 4.862544 |
| C  | -1.835542 | 3.362669  | 3.766019 |
| C  | -1.089246 | 2.135839  | 3.671472 |
| Br | -0.613955 | 1.142147  | 5.245491 |
| C  | -0.974652 | -1.474255 | 2.524382 |
| C  | 4.737097  | 5.453151  | 4.747142 |
| C  | 5.708646  | 2.786976  | 5.949973 |
| H  | 5.911431  | 3.279342  | 6.908458 |
| H  | 5.480586  | 1.732688  | 6.145266 |
| H  | 6.632010  | 2.823171  | 5.358899 |
| H  | 4.912950  | 2.853224  | 2.732372 |
| H  | 3.842354  | 1.689910  | 3.535158 |
| H  | 3.170878  | 3.170566  | 2.829942 |

|   |           |           |           |
|---|-----------|-----------|-----------|
| H | -0.976881 | -1.516750 | 3.617966  |
| H | -2.015282 | -1.435272 | 2.181957  |
| H | -0.529852 | -2.404696 | 2.149198  |
| H | 2.331724  | 0.830775  | 2.091545  |
| H | 1.806316  | 0.087547  | 3.611827  |
| H | 2.262880  | -0.935054 | 2.236565  |
| H | 0.506298  | -0.902033 | -0.365085 |
| H | -1.016602 | -0.003297 | -0.410716 |
| H | 0.533054  | 0.867410  | -0.406432 |
| H | 3.953289  | 5.975588  | 4.189885  |
| H | 4.870354  | 5.963008  | 5.708390  |
| H | 5.673757  | 5.545005  | 4.182765  |

## 2.7 Seleno[7]helicene radical cation

|    |           |           |           |
|----|-----------|-----------|-----------|
| C  | 0.000000  | 0.000000  | 0.000000  |
| Si | 0.000000  | 0.000000  | 1.877350  |
| C  | 1.767459  | 0.000000  | 2.526423  |
| C  | -0.792353 | -1.619688 | 2.470089  |
| Se | 0.172461  | -2.730125 | 3.678142  |
| C  | -1.291789 | -3.883786 | 3.634951  |
| C  | -2.290139 | -3.488132 | 2.757238  |
| C  | -2.003755 | -2.195213 | 2.193074  |
| Br | -3.378767 | -1.138749 | 1.359975  |
| Se | -1.741170 | -5.379613 | 4.691060  |
| C  | -3.348782 | -5.352365 | 3.750384  |
| Se | -4.910008 | -6.418880 | 3.978640  |
| C  | -5.533943 | -5.474017 | 2.501803  |
| Se | -7.225164 | -5.465552 | 1.702738  |
| C  | -6.371176 | -4.368944 | 0.407425  |
| Se | -7.087525 | -3.456517 | -1.037428 |
| C  | -5.291635 | -3.005929 | -1.428673 |
| Se | -4.570196 | -1.955140 | -2.813909 |
| C  | -2.912811 | -2.530720 | -2.139514 |
| Se | -1.166365 | -2.259444 | -2.739345 |
| C  | -0.624936 | -3.561159 | -1.448676 |
| Si | 1.214122  | -4.002150 | -1.308564 |
| C  | 1.505569  | -5.760608 | -1.906571 |
| C  | -3.414696 | -4.415283 | 2.724568  |
| C  | -4.564890 | -4.619426 | 1.881978  |

|    |           |           |           |
|----|-----------|-----------|-----------|
| C  | -4.987537 | -4.194299 | 0.583855  |
| C  | -4.360252 | -3.567793 | -0.576448 |
| C  | -3.002620 | -3.406645 | -1.062164 |
| C  | -1.724680 | -4.008332 | -0.772613 |
| Br | -1.601588 | -5.619002 | 0.279455  |
| C  | -0.936517 | 1.468027  | 2.585957  |
| C  | 1.736758  | -3.773035 | 0.480910  |
| C  | 2.139592  | -2.787370 | -2.410739 |
| H  | 1.803236  | -0.016121 | 3.621935  |
| H  | 2.330690  | -0.862228 | 2.149984  |
| H  | 2.282870  | 0.909500  | 2.194203  |
| H  | 0.445953  | 0.927163  | -0.381783 |
| H  | 0.587025  | -0.841604 | -0.381810 |
| H  | -1.011863 | -0.084045 | -0.405802 |
| H  | 1.018267  | -6.500203 | -1.264128 |
| H  | 1.124333  | -5.891239 | -2.926184 |
| H  | 2.581858  | -5.974716 | -1.918569 |
| H  | 1.573683  | -2.736973 | 0.794121  |
| H  | 1.168853  | -4.421481 | 1.153518  |
| H  | 2.802976  | -4.002703 | 0.602107  |
| H  | 3.218245  | -2.977405 | -2.351898 |
| H  | 1.845635  | -2.882520 | -3.462557 |
| H  | 1.962615  | -1.752222 | -2.095380 |
| H  | -1.957352 | 1.533686  | 2.198158  |
| H  | -0.990968 | 1.401157  | 3.678962  |
| H  | -0.413180 | 2.398045  | 2.330159  |

## 2.8 Seleno[8]helicene radical cation

|    |           |           |          |
|----|-----------|-----------|----------|
| C  | 0.000000  | 0.000000  | 0.000000 |
| Si | 0.000000  | 0.000000  | 1.883001 |
| C  | 1.765979  | 0.000000  | 2.533630 |
| C  | -0.818799 | -1.623032 | 2.426116 |
| C  | -1.176402 | -2.120518 | 3.642760 |
| Br | -0.746742 | -1.142536 | 5.245890 |
| C  | -1.633004 | -3.490914 | 3.727629 |
| C  | -2.076314 | -4.368573 | 4.791853 |
| C  | -2.613016 | -4.206613 | 6.144096 |
| C  | -3.232292 | -3.149937 | 6.901273 |
| C  | -3.740245 | -1.828059 | 6.641070 |
| C  | -3.999433 | -1.005009 | 5.458588 |
| C  | -4.170681 | -1.234690 | 4.038253 |
| C  | -4.527580 | -2.367292 | 3.211530 |
| Br | -5.221052 | -3.973603 | 4.017719 |

|    |           |           |           |
|----|-----------|-----------|-----------|
| C  | -1.471213 | -4.147642 | 2.510652  |
| Se | -1.609065 | -6.016846 | 2.608736  |
| C  | -1.986082 | -5.703212 | 4.424708  |
| Se | -2.300366 | -6.927297 | 5.815826  |
| C  | -2.634044 | -5.418250 | 6.842412  |
| Se | -3.115221 | -5.309176 | 8.672089  |
| C  | -3.383562 | -3.509840 | 8.281508  |
| Se | -3.820544 | -2.111560 | 9.428878  |
| C  | -3.925559 | -1.107204 | 7.825347  |
| Se | -4.123354 | 0.725151  | 7.611899  |
| C  | -4.083840 | 0.343625  | 5.771927  |
| Se | -4.100730 | 1.514678  | 4.300024  |
| C  | -4.116817 | -0.064403 | 3.285764  |
| Se | -4.263858 | -0.353218 | 1.451249  |
| C  | -4.604301 | -2.195630 | 1.862184  |
| Si | -5.209047 | -3.308642 | 0.449696  |
| C  | -4.827301 | -2.399280 | -1.154368 |
| Se | -0.970834 | -3.016971 | 1.117231  |
| C  | -0.936019 | 1.504301  | 2.501696  |
| C  | -4.339738 | -4.971786 | 0.440033  |
| C  | -7.067736 | -3.529470 | 0.645948  |
| H  | -5.332661 | -1.428035 | -1.210553 |
| H  | -3.750334 | -2.232444 | -1.273104 |
| H  | -5.168570 | -2.999132 | -2.006925 |
| H  | -4.773333 | -5.592983 | -0.354482 |
| H  | -3.271232 | -4.854259 | 0.234645  |
| H  | -4.451636 | -5.505048 | 1.386968  |
| H  | 1.790043  | 0.003895  | 3.628476  |
| H  | 2.311712  | -0.884565 | 2.185129  |
| H  | 2.300017  | 0.890626  | 2.179050  |
| H  | -1.932974 | 1.557224  | 2.053388  |
| H  | -1.046736 | 1.507196  | 3.588578  |
| H  | -0.383843 | 2.408048  | 2.212750  |
| H  | 0.474828  | 0.917981  | -0.367408 |
| H  | 0.556875  | -0.848514 | -0.414455 |
| H  | -1.020172 | -0.031537 | -0.400054 |
| H  | -7.312995 | -4.060343 | 1.571856  |
| H  | -7.577463 | -2.559148 | 0.665613  |
| H  | -7.470967 | -4.108452 | -0.194482 |

## 2.9 Seleno[9]helicene radical cation

|   |          |          |          |
|---|----------|----------|----------|
| C | 0.000000 | 0.000000 | 0.000000 |
|---|----------|----------|----------|

|    |           |           |          |
|----|-----------|-----------|----------|
| Si | 0.000000  | 0.000000  | 1.885763 |
| C  | 1.776265  | 0.000000  | 2.507593 |
| C  | -0.959586 | -1.486491 | 2.523642 |
| C  | -0.895095 | 1.599404  | 2.434278 |
| Se | -1.855119 | 2.577597  | 1.101217 |
| C  | -2.521127 | 3.641766  | 2.471734 |
| Se | -3.991263 | 4.828564  | 2.515334 |
| C  | -3.684550 | 4.848802  | 4.369730 |
| Se | -4.747274 | 5.507872  | 5.762933 |
| C  | -3.374338 | 4.862407  | 6.877201 |
| Se | -3.232813 | 4.836109  | 8.751743 |
| C  | -1.515151 | 4.171012  | 8.452740 |
| Se | -0.176315 | 3.638445  | 9.667192 |
| C  | 0.894273  | 3.526256  | 8.120499 |
| Se | 2.617754  | 2.852078  | 7.881291 |
| C  | 2.403206  | 3.383753  | 6.090784 |
| Se | 3.522902  | 3.135192  | 4.598244 |
| C  | 2.236306  | 4.145006  | 3.687355 |
| Se | 2.189025  | 4.719884  | 1.898347 |
| C  | 0.771531  | 5.824118  | 2.484068 |
| Se | -0.109767 | 7.225497  | 1.639206 |
| C  | -0.773366 | 7.739234  | 3.357128 |
| C  | -0.323777 | 6.844813  | 4.286108 |
| Br | -0.482739 | 7.266379  | 6.150302 |
| C  | -1.135950 | 2.166937  | 3.652891 |
| C  | -1.980229 | 3.347516  | 3.718318 |
| C  | -2.536509 | 4.157841  | 4.788476 |
| C  | -2.278331 | 4.342206  | 6.206692 |
| C  | -1.142145 | 4.129995  | 7.102135 |
| C  | 0.275143  | 3.952974  | 6.937475 |
| C  | 1.215960  | 4.046878  | 5.822209 |
| C  | 1.207797  | 4.648532  | 4.499360 |
| C  | 0.483486  | 5.722070  | 3.840417 |
| Br | -0.641081 | 1.219246  | 5.245121 |
| Si | -1.709573 | 9.402893  | 3.483258 |
| C  | -0.604944 | 10.662146 | 4.338492 |
| C  | -2.064529 | 9.958829  | 1.716611 |
| C  | -3.336313 | 9.168612  | 4.400114 |
| H  | -1.153444 | 10.152258 | 1.142749 |
| H  | -2.673284 | 9.237808  | 1.163142 |
| H  | -2.625333 | 10.898395 | 1.743694 |
| H  | -3.867636 | 10.124381 | 4.451617 |
| H  | -3.983402 | 8.457837  | 3.879100 |
| H  | -3.188949 | 8.812957  | 5.421446 |
| H  | -0.981979 | -1.525995 | 3.614553 |



|   |           |           |           |
|---|-----------|-----------|-----------|
| H | -1.992444 | -1.473845 | 2.164921  |
| H | -0.494211 | -2.409966 | 2.164228  |
| H | 2.333869  | 0.850987  | 2.107246  |
| H | 1.834019  | 0.034376  | 3.597001  |
| H | 2.280148  | -0.912856 | 2.174057  |
| H | 0.528704  | -0.889334 | -0.357178 |
| H | -1.007986 | -0.041652 | -0.423127 |
| H | 0.514113  | 0.869256  | -0.420550 |
| H | -0.376424 | 10.378857 | 5.367895  |
| H | 0.341107  | 10.785520 | 3.804257  |
| H | -1.103072 | 11.636769 | 4.361711  |

## 2.10 Seleno[10]helicene radical cation

|    |           |           |           |
|----|-----------|-----------|-----------|
| C  | 0.000000  | 0.000000  | 0.000000  |
| Si | 0.000000  | 0.000000  | 1.882295  |
| C  | 1.785793  | 0.000000  | 2.486475  |
| C  | -0.827650 | -1.571101 | 2.572254  |
| C  | -2.048092 | -2.151906 | 2.367966  |
| Br | -3.366370 | -1.212161 | 1.321597  |
| Se | 0.074449  | -2.513957 | 3.970250  |
| C  | -1.435246 | -3.598116 | 4.092803  |
| Se | -1.975746 | -4.793857 | 5.448419  |
| C  | -3.592625 | -4.855984 | 4.494386  |
| Se | -5.236053 | -5.623757 | 4.980020  |
| C  | -5.805018 | -4.993096 | 3.300179  |
| Se | -7.522159 | -4.925639 | 2.548043  |
| C  | -6.669355 | -4.180963 | 1.066882  |
| Se | -7.381900 | -3.637939 | -0.601174 |
| C  | -5.589139 | -3.477951 | -1.096036 |
| Se | -4.819052 | -2.818348 | -2.663327 |
| C  | -3.199138 | -3.414867 | -1.885491 |
| Se | -1.436105 | -3.114911 | -2.412164 |
| C  | -0.981759 | -4.108307 | -0.887183 |
| Se | 0.706121  | -4.580251 | -0.200426 |
| C  | -0.288064 | -5.665139 | 0.966099  |
| Se | 0.307746  | -6.808216 | 2.332374  |
| C  | -1.485981 | -7.391704 | 2.373844  |
| Se | -2.267387 | -8.831595 | 3.260252  |
| C  | -3.784729 | -8.592554 | 2.121088  |

|    |           |            |           |
|----|-----------|------------|-----------|
| Si | -5.179842 | -9.886395  | 2.216114  |
| C  | -5.082909 | -11.025114 | 0.718288  |
| C  | -2.404223 | -3.327071  | 3.137450  |
| C  | -3.594404 | -4.166342  | 3.278002  |
| C  | -4.809967 | -4.406087  | 2.522939  |
| C  | -5.282297 | -4.133185  | 1.163599  |
| C  | -4.660726 | -3.931515  | -0.122373 |
| C  | -3.333158 | -4.074809  | -0.668038 |
| C  | -2.068252 | -4.650687  | -0.205701 |
| C  | -1.667054 | -5.680301  | 0.734587  |
| C  | -2.315986 | -6.783966  | 1.442725  |
| C  | -3.548746 | -7.530852  | 1.293035  |
| Br | -4.689255 | -7.269447  | -0.238882 |
| C  | -0.881648 | 1.522028   | 2.557333  |
| C  | -6.868068 | -9.061549  | 2.328164  |
| C  | -4.896253 | -10.897387 | 3.781857  |
| H  | 1.859778  | 0.033781   | 3.578090  |
| H  | 2.341967  | -0.873498  | 2.131962  |
| H  | 2.292925  | 0.891209   | 2.100291  |
| H  | 0.535090  | 0.887166   | -0.357993 |
| H  | 0.513733  | -0.881340  | -0.395174 |
| H  | -1.007726 | 0.026126   | -0.420133 |
| H  | -5.273277 | -10.495367 | -0.218724 |
| H  | -4.097720 | -11.496637 | 0.645545  |
| H  | -5.829660 | -11.822051 | 0.809993  |
| H  | -6.928500 | -8.401661  | 3.198650  |
| H  | -7.110064 | -8.477127  | 1.437886  |
| H  | -7.637281 | -9.834337  | 2.440676  |
| H  | -5.688426 | -11.649322 | 3.869202  |
| H  | -3.941999 | -11.433538 | 3.768440  |
| H  | -4.929623 | -10.279286 | 4.684546  |
| H  | -1.915872 | 1.590604   | 2.210139  |
| H  | -0.892436 | 1.517450   | 3.651902  |
| H  | -0.358309 | 2.428132   | 2.231372  |



3. Spin density plot with contour cutoff = 0.004 a.u. for the most stable structures of end substituted seleno[n]helicenes radical cation,  $[n]SH^{+i}$ ,  $n=1-10$  (S1a-S1j) at B3LYP-D/6-311++G(d,p) level of theory in DCM solvent following ROHF formalism.

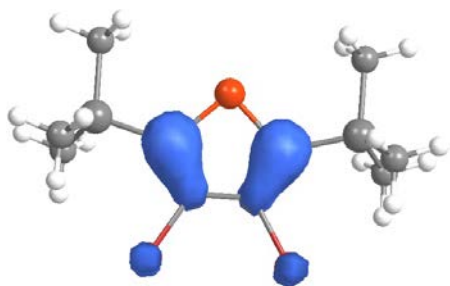

**[1]SH<sup>+i</sup>**  
**S1a**

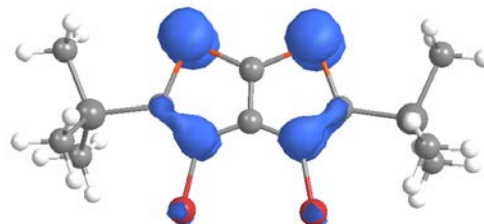

**[2]SH<sup>+i</sup>**  
**S1b**

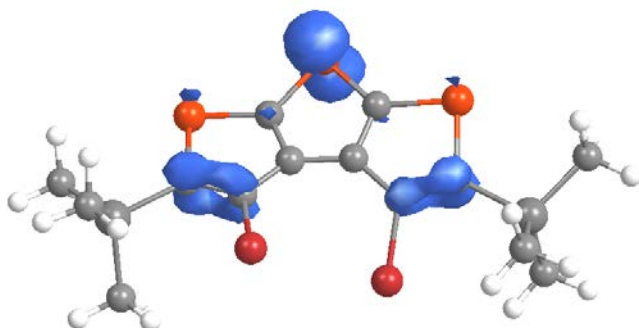

**[3]SH<sup>+i</sup>**  
**S1c**

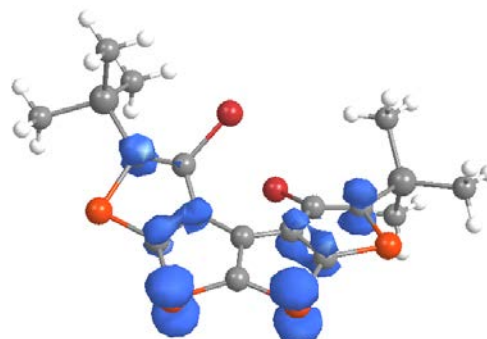

**[4]SH<sup>+i</sup>**  
**S1d**

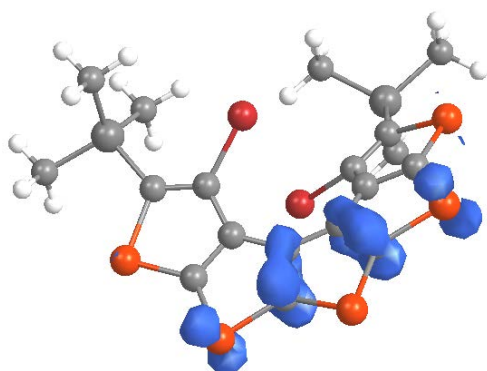

**[5]SH<sup>+i</sup>**  
**S1e**

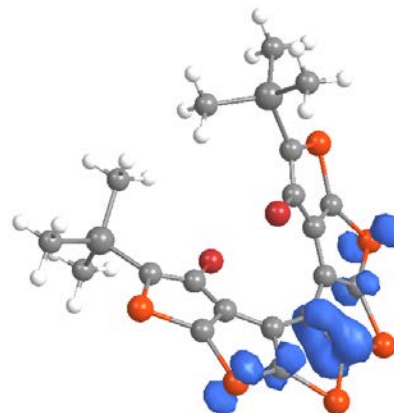

**[6]SH<sup>+i</sup>**  
**S1f**

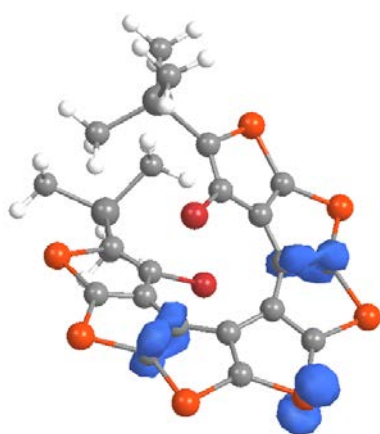

**[7]SH<sup>+</sup>  
S1g**

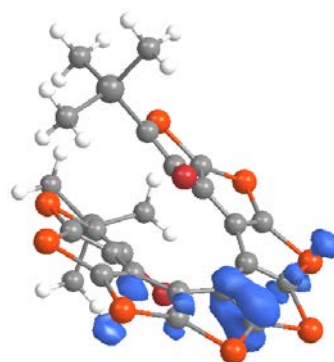

**[8]SH<sup>+</sup>  
S1h**

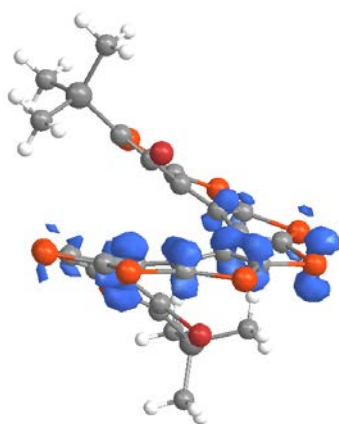

**[9]SH<sup>+</sup>  
S1i**

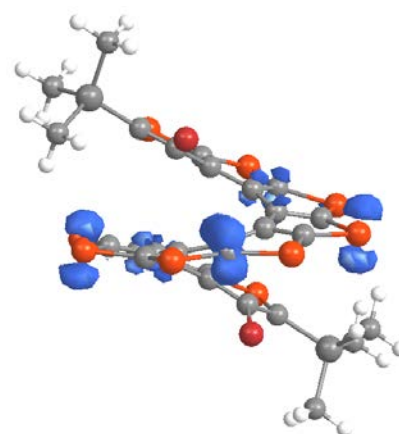

**[10]SH<sup>+</sup>  
S1j**

**Fig. S1** Spin density plot for the most stable structures of seleno[n]helicenes radical cation, [n]SH<sup>+</sup>, n=1-10 (S1a-S1j) at B3LYP-D/6-311++G(d,p) level of theory in DCM solvent with contour cutoff= 0.004 a.u.

4) Molecular orbital plots with contour cutoff = 0.02 a.u. for the most stable structure of end substituted seleno[n]helicenes radical cation, n=2,4-6,8-10 (S2a-S2u) at B3LYP-D/6-311++G(d,p) level of theory in DCM solvent.

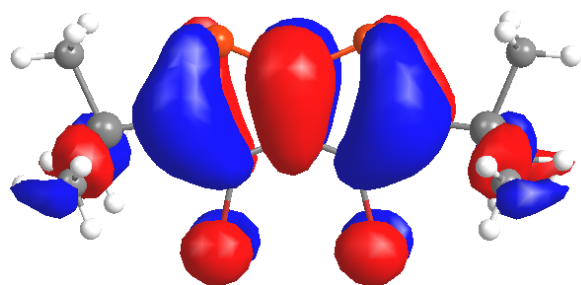

[2]SH<sup>+</sup> (H)  
S2a

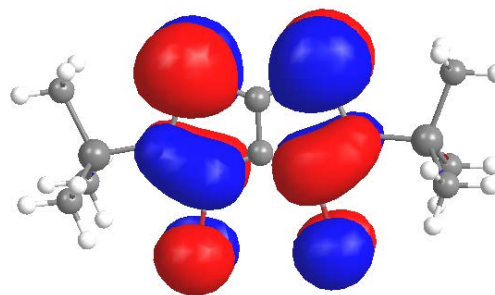

[2]SH<sup>+</sup> (L)  
S2b

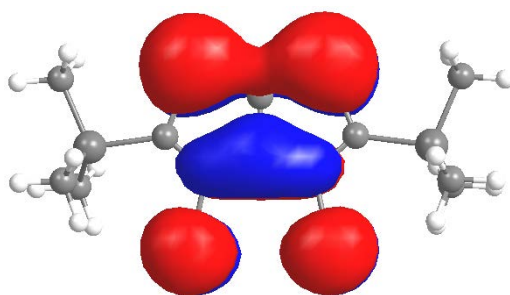

[2]SH<sup>+</sup> (H-1)  
S2c

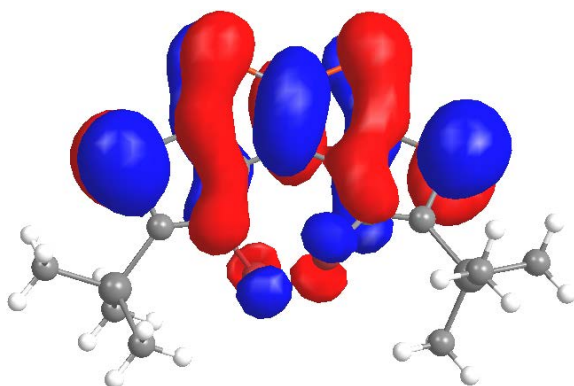

[4]SH<sup>+</sup> (H)  
S2d

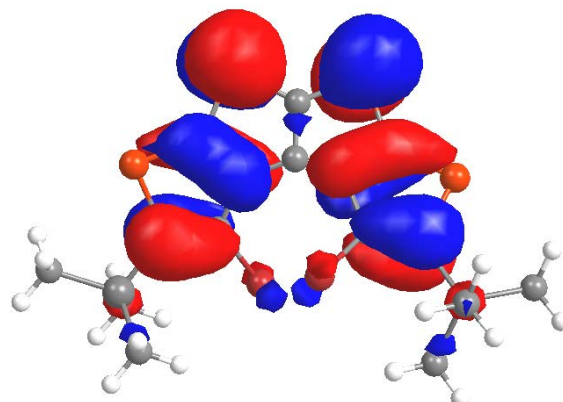

[4]SH<sup>+</sup> (L)  
S2e

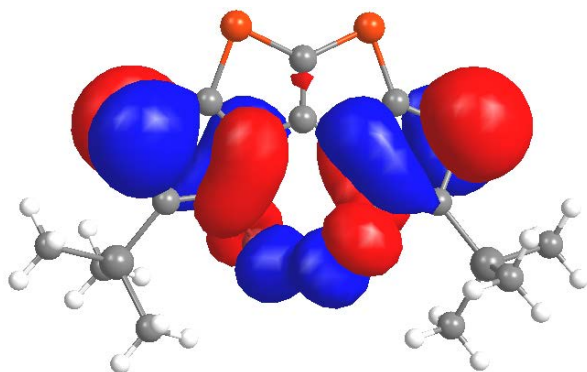

**[4]SH<sup>+</sup> (H)**  
**S2f**

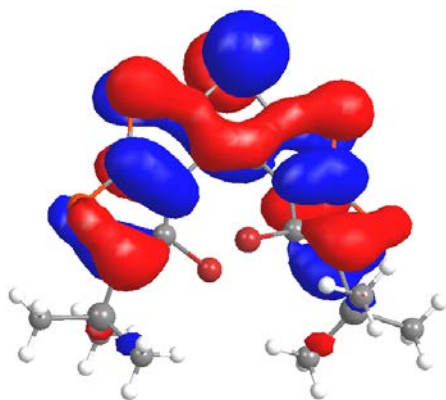

**[5]SH<sup>+</sup> (H)**  
**S2g**

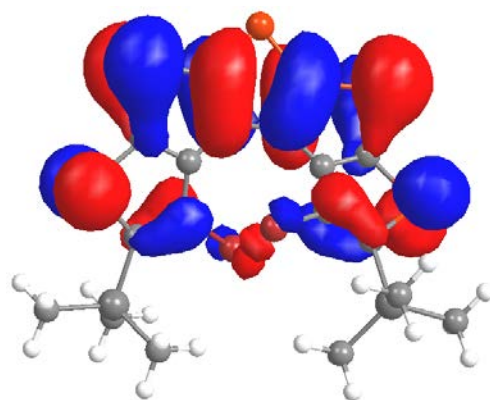

**[5]SH<sup>+</sup> (L)**  
**S2h**

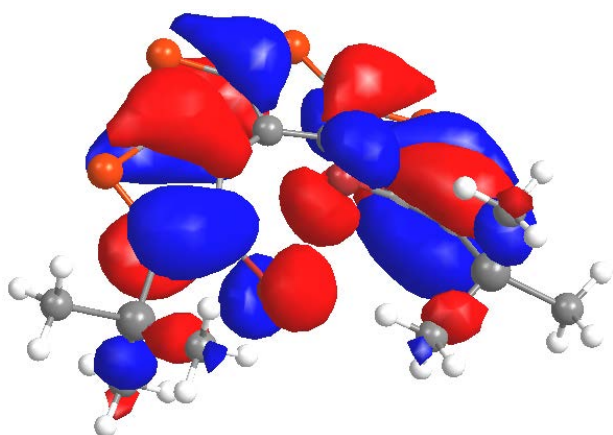

**[5]SH<sup>+</sup> (H-1)**  
**S2i**

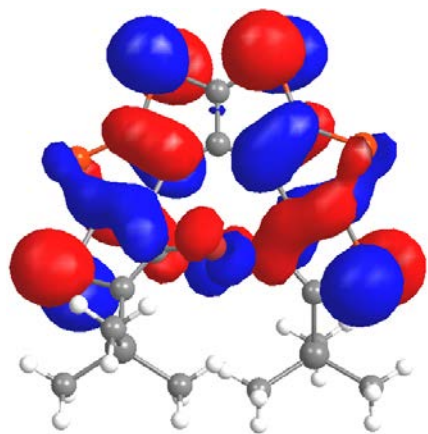

**[6]SH<sup>+</sup> (H)**  
**S2j**

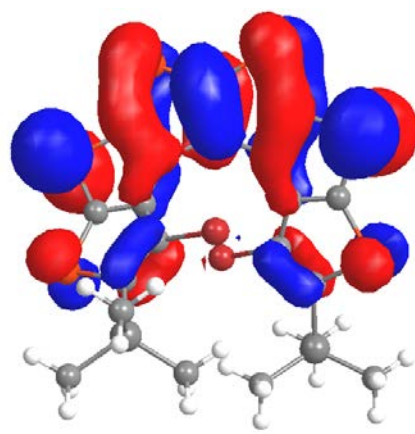

**[6]SH<sup>+</sup> (L)**  
**S2k**

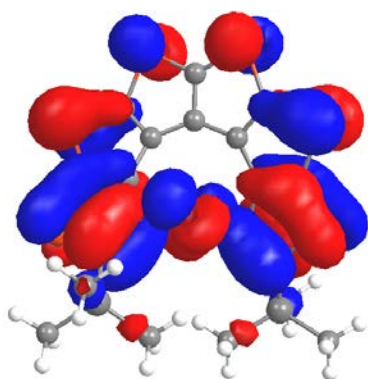

**[6]SH<sup>+</sup> (H-1)**  
**S2l**

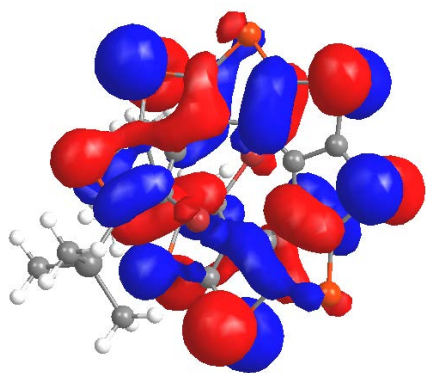

**[8]SH<sup>+</sup> (H)**  
**S2m**

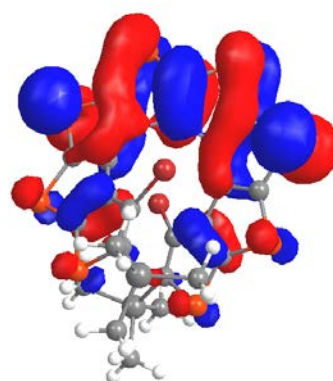

**[8]SH<sup>+</sup> (L)**  
**S2n**



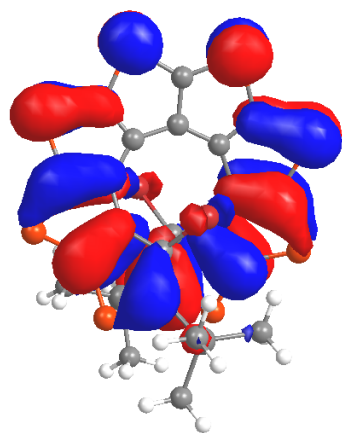

**[8]SH<sup>+</sup> (H)**  
S2o

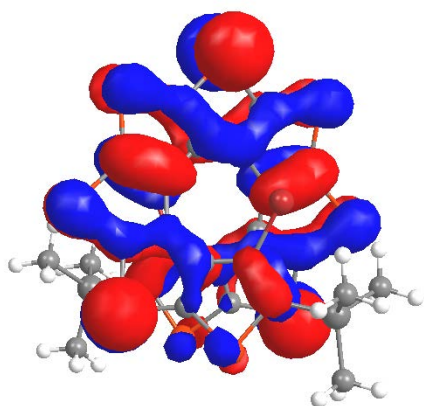

**[9]SH<sup>+</sup> (H)**  
S2p

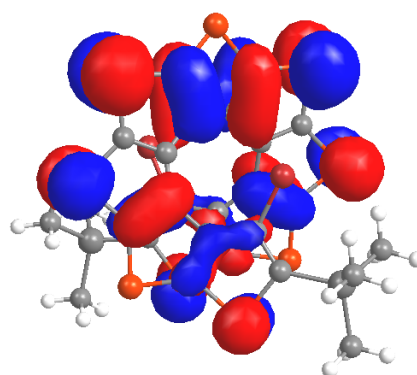

**[9]SH<sup>+</sup> (L)**  
S2q

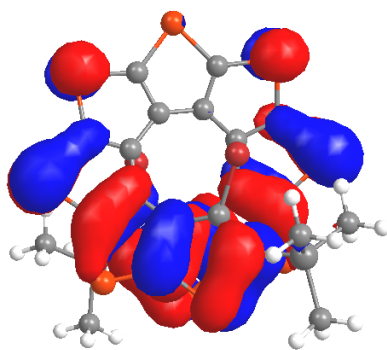

**[9]SH<sup>+</sup> (H-2)**  
S2r

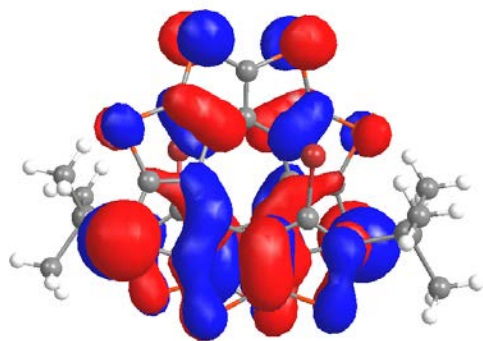

**[10]SH<sup>+</sup> (H)**  
**S2s**

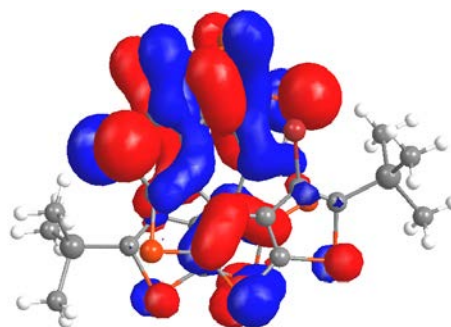

**[10]SH<sup>+</sup> (L)**  
**S2t**

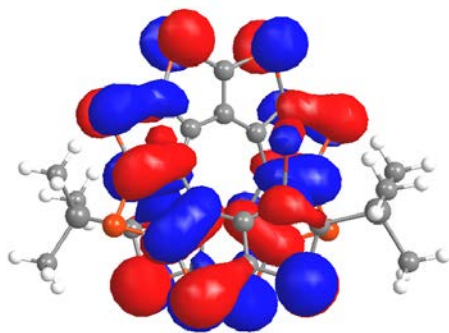

**10]SH<sup>+</sup> (H-1)**  
**S2u**

**Fig. S2** Molecular orbital plot for seleno[n]helicenes radical cation, [n]SH<sup>+</sup>, n=2,4-6,8-10, S2a-S2u calculated using B3LYP-D as functional and 6-311++G(d,p) in DCM solvent with contour cutoff= 0.02 a.u.

5) Cartesian coordinates for the most stable structures of Å-dimer of neutral unsubstituted and end substituted seleno[7]helicene at B3LYP-D /6-311++G(d,p) level in DCM solvent.

### 5.1 Å-dimer of unsubstituted neutral seleno[7]helicene

|    |           |           |           |
|----|-----------|-----------|-----------|
| C  | 0.000000  | 0.000000  | 0.000000  |
| Se | 0.000000  | 0.000000  | 1.890628  |
| C  | 1.887743  | 0.000000  | 1.716438  |
| Se | 3.245532  | -0.285044 | 2.999521  |
| C  | 4.411041  | -0.245542 | 1.512571  |
| Se | 6.221115  | -0.773065 | 1.359456  |
| C  | 5.975936  | -0.434611 | -0.483760 |
| Se | 7.180043  | -0.554673 | -1.933996 |
| C  | 5.803913  | 0.287771  | -2.914198 |
| Se | 5.801522  | 1.002728  | -4.664979 |
| C  | 4.190226  | 1.832010  | -4.135838 |
| Se | 3.062355  | 3.082438  | -4.970166 |
| C  | 2.150901  | 3.159579  | -3.306638 |
| C  | 2.685607  | 2.325081  | -2.380503 |
| C  | 3.811697  | 1.550034  | -2.832813 |
| C  | 4.685309  | 0.606872  | -2.161745 |
| C  | 4.732124  | 0.079531  | -0.809024 |
| C  | 3.793914  | 0.031907  | 0.303624  |
| C  | 2.344094  | 0.069341  | 0.411379  |
| C  | 1.267326  | -0.010441 | -0.558300 |
| C  | 1.265799  | -0.251837 | -1.974548 |
| C  | 0.044140  | -0.404556 | -2.538491 |
| Se | -1.360055 | -0.258119 | -1.273643 |
| C  | 2.549296  | -0.876431 | -5.663576 |
| C  | 3.097013  | -1.669302 | -4.712198 |
| C  | 4.305068  | -2.347471 | -5.092634 |
| C  | 5.243522  | -3.155802 | -4.336361 |
| C  | 5.264329  | -3.650867 | -2.969065 |
| C  | 4.291622  | -3.686276 | -1.885964 |
| C  | 2.840760  | -3.672350 | -1.816380 |
| C  | 1.795119  | -3.921683 | -2.789776 |
| C  | 1.828726  | -4.301592 | -4.178266 |
| C  | 0.615414  | -4.504361 | -4.749902 |
| Se | -0.817334 | -4.239171 | -3.532970 |
| C  | 0.515810  | -3.878321 | -2.258485 |
| Se | 0.467846  | -3.614142 | -0.389801 |
| C  | 2.354109  | -3.582044 | -0.522375 |
| Se | 3.681364  | -3.717006 | 0.813460  |
| C  | 4.880106  | -3.834867 | -0.641451 |

|    |           |           |           |
|----|-----------|-----------|-----------|
| Se | 6.722819  | -4.251573 | -0.696171 |
| C  | 6.527451  | -4.053733 | -2.567248 |
| Se | 7.824499  | -4.060891 | -3.941515 |
| C  | 6.436453  | -3.352334 | -5.010354 |
| Se | 6.459392  | -2.677341 | -6.781717 |
| C  | 4.721885  | -2.050004 | -6.379248 |
| Se | 3.552814  | -0.876937 | -7.271613 |
| H  | 1.299407  | 3.815965  | -3.192210 |
| H  | -0.187255 | -0.586355 | -3.578263 |
| H  | 2.176165  | -0.304107 | -2.546899 |
| H  | 2.289206  | 2.247302  | -1.377413 |
| H  | 0.404383  | -4.776584 | -5.774763 |
| H  | 1.647471  | -0.285141 | -5.594261 |
| H  | 2.657501  | -1.787945 | -3.736585 |
| H  | 2.751958  | -4.413859 | -4.730007 |

## 5.2 $\Delta$ -dimer of unsubstituted radical cation of seleno[7]helicene

|    |           |           |           |
|----|-----------|-----------|-----------|
| C  | 0.000000  | 0.000000  | 0.000000  |
| Se | 0.000000  | 0.000000  | 1.887777  |
| C  | 1.871523  | 0.000000  | 1.716994  |
| Se | 3.217442  | -0.285438 | 3.018623  |
| C  | 4.384371  | -0.258181 | 1.539626  |
| Se | 6.187448  | -0.738697 | 1.411847  |
| C  | 5.980799  | -0.326850 | -0.414770 |
| Se | 7.198247  | -0.393097 | -1.842993 |
| C  | 5.831028  | 0.349387  | -2.870830 |
| Se | 5.891730  | 1.129478  | -4.594216 |
| C  | 4.269454  | 1.927221  | -4.085295 |
| Se | 3.169680  | 3.180683  | -4.919029 |
| C  | 2.200277  | 3.216917  | -3.283415 |
| C  | 2.696953  | 2.365347  | -2.356567 |
| C  | 3.841822  | 1.603433  | -2.788654 |
| C  | 4.685982  | 0.655226  | -2.131677 |
| C  | 4.722273  | 0.132589  | -0.765316 |
| C  | 3.774203  | 0.049686  | 0.313568  |
| C  | 2.334712  | 0.075122  | 0.407079  |
| C  | 1.264132  | 0.002436  | -0.566482 |
| C  | 1.252307  | -0.189742 | -1.990510 |
| C  | 0.015518  | -0.285887 | -2.545641 |
| Se | -1.365583 | -0.197850 | -1.270381 |
| Se | 6.283263  | -3.285879 | -2.554772 |
| C  | 4.509589  | -3.003233 | -2.109818 |
| Se | 3.586560  | -3.373908 | -0.498767 |

|    |           |           |           |
|----|-----------|-----------|-----------|
| C  | 2.059205  | -3.290363 | -1.577330 |
| Se | 0.272662  | -3.636987 | -1.177223 |
| C  | 0.011050  | -3.562903 | -3.057038 |
| Se | -1.468779 | -3.922241 | -4.134103 |
| C  | -0.280842 | -3.729624 | -5.595496 |
| C  | 0.984727  | -3.429313 | -5.205816 |
| C  | 1.161772  | -3.308326 | -3.783872 |
| C  | 2.320997  | -3.064669 | -2.956609 |
| C  | 3.682756  | -2.778743 | -3.225103 |
| C  | 4.448916  | -2.494383 | -4.443384 |
| C  | 5.784699  | -2.836153 | -4.312987 |
| Se | 6.839544  | -2.500407 | -5.835761 |
| C  | 5.250749  | -1.821492 | -6.563259 |
| Se | 4.946281  | -0.896106 | -8.175057 |
| C  | 3.255648  | -0.494180 | -7.422509 |
| C  | 3.055973  | -1.029417 | -6.159400 |
| C  | 4.159411  | -1.833968 | -5.686277 |
| Se | 1.838922  | 0.596897  | -7.982908 |
| C  | 1.073812  | 0.239552  | -6.288459 |
| C  | 1.839791  | -0.587836 | -5.536380 |
| H  | 1.349103  | 3.876424  | -3.186317 |
| H  | -0.240044 | -0.413171 | -3.586643 |
| H  | 2.155260  | -0.261809 | -2.575230 |
| H  | 2.269452  | 2.269306  | -1.369085 |
| H  | -0.650912 | -3.857754 | -6.603148 |
| H  | 0.125695  | 0.686731  | -6.024718 |
| H  | 1.564055  | -0.887907 | -4.540420 |
| H  | 1.792233  | -3.300984 | -5.912245 |

### 5.3 Å-dimer of end substituted neutral seleno[7]helicene

|    |           |           |           |
|----|-----------|-----------|-----------|
| C  | 0.000000  | 0.000000  | 0.000000  |
| Si | 0.000000  | 0.000000  | 1.883213  |
| C  | 1.774320  | 0.000000  | 2.519105  |
| C  | -0.821601 | 1.566283  | 2.549492  |
| C  | -2.114638 | 2.002891  | 2.490811  |
| Br | -3.329745 | 1.090483  | 1.327360  |
| Se | 0.243965  | 2.880333  | 3.431718  |
| C  | -1.317291 | 3.893698  | 3.588113  |
| C  | -2.459496 | 3.262539  | 3.114013  |
| C  | -3.672056 | 4.070002  | 3.267650  |
| C  | -3.371519 | 5.359402  | 3.673102  |
| Se | -1.574330 | 5.670840  | 4.151630  |
| Se | -4.776464 | 6.603558  | 3.511134  |
| C  | -5.771282 | 5.106671  | 2.944951  |
| C  | -5.109685 | 3.888991  | 3.037699  |
| C  | -6.032576 | 2.763525  | 2.890926  |
| C  | -7.264070 | 3.157862  | 2.382218  |
| Se | -7.548075 | 5.016744  | 2.331149  |
| Se | -8.387102 | 1.754405  | 1.820828  |
| C  | -7.036730 | 0.650058  | 2.534212  |
| Se | -6.884889 | -1.235207 | 2.564867  |
| C  | -5.380621 | -0.912377 | 3.657045  |
| C  | -5.142351 | 0.428062  | 3.914692  |
| C  | -5.997486 | 1.327905  | 3.150383  |
| Se | -4.199201 | -2.065471 | 4.534539  |
| C  | -3.475834 | -0.517078 | 5.391860  |
| Si | -2.078478 | -0.714653 | 6.649662  |
| C  | -2.695685 | -0.333485 | 8.386483  |
| C  | -4.142678 | 0.587055  | 4.943475  |
| Br | -3.985459 | 2.242207  | 5.920236  |
| C  | -0.903313 | -1.508355 | 2.550526  |
| C  | -1.510038 | -2.509634 | 6.563714  |
| C  | -0.663455 | 0.422428  | 6.161122  |
| Br | -5.927326 | 1.425553  | -1.091610 |
| C  | -7.375979 | 2.507875  | -1.718419 |
| C  | -8.545637 | 1.889950  | -2.059271 |
| Si | -8.970339 | 0.064003  | -2.300293 |
| C  | -8.861604 | -0.863300 | -0.664752 |
| C  | -7.347582 | 3.951212  | -1.617580 |
| C  | -6.348984 | 4.969454  | -1.282634 |
| C  | -4.895372 | 5.014505  | -1.088956 |
| C  | -3.743874 | 4.193532  | -1.463232 |
| C  | -3.482239 | 3.104326  | -2.398560 |

|    |            |           |           |
|----|------------|-----------|-----------|
| C  | -4.165096  | 2.537664  | -3.555165 |
| C  | -5.233816  | 2.962155  | -4.427313 |
| Br | -5.801572  | 4.804509  | -4.468283 |
| C  | -8.624636  | 4.470328  | -1.783796 |
| Se | -8.790333  | 6.301528  | -1.382641 |
| C  | -6.943924  | 6.191127  | -1.016552 |
| Se | -5.834383  | 7.463874  | -0.181749 |
| C  | -4.508562  | 6.138170  | -0.369947 |
| Se | -2.721903  | 6.144156  | 0.221336  |
| C  | -2.599358  | 4.541843  | -0.756373 |
| Se | -1.167898  | 3.326657  | -0.897139 |
| C  | -2.286528  | 2.454777  | -2.138293 |
| Se | -2.027858  | 0.848629  | -3.103510 |
| C  | -3.627573  | 1.332899  | -3.978896 |
| Se | -4.581000  | 0.537464  | -5.376640 |
| C  | -5.671084  | 2.108253  | -5.399193 |
| Si | -7.063064  | 2.259413  | -6.669392 |
| C  | -7.223218  | 0.581527  | -7.512869 |
| Se | -9.918750  | 3.202428  | -2.237931 |
| C  | -6.644405  | 3.570504  | -7.953364 |
| C  | -8.660043  | 2.670502  | -5.766854 |
| C  | -10.736728 | -0.005586 | -2.954289 |
| C  | -7.803300  | -0.684264 | -3.570954 |
| H  | -2.311163  | -3.204810 | 6.841812  |
| H  | -1.160897  | -2.775123 | 5.559331  |
| H  | -0.677508  | -2.668439 | 7.260307  |
| H  | 0.161260   | 0.335838  | 6.880125  |
| H  | -0.282039  | 0.157759  | 5.170523  |
| H  | -0.979164  | 1.468895  | 6.127843  |
| H  | -1.018912  | 0.055245  | -0.392557 |
| H  | 0.571277   | 0.846235  | -0.398139 |
| H  | 0.460782   | -0.924126 | -0.372361 |
| H  | -0.838385  | -1.547254 | 3.642195  |
| H  | -1.961465  | -1.501102 | 2.276224  |
| H  | -0.450867  | -2.425227 | 2.151110  |
| H  | 2.292523   | -0.902988 | 2.173268  |
| H  | 2.340153   | 0.865929  | 2.154973  |
| H  | 1.809143   | 0.005411  | 3.614864  |
| H  | -3.015430  | 0.708857  | 8.481580  |
| H  | -3.544983  | -0.975001 | 8.649772  |
| H  | -1.896377  | -0.513352 | 9.116922  |
| H  | -11.453857 | 0.423555  | -2.244247 |
| H  | -10.835180 | 0.530616  | -3.905458 |
| H  | -11.027223 | -1.049137 | -3.127896 |
| H  | -8.023659  | -1.751643 | -3.701502 |

|   |           |           |           |
|---|-----------|-----------|-----------|
| H | -7.921445 | -0.193584 | -4.541908 |
| H | -6.757516 | -0.585013 | -3.268577 |
| H | -6.563636 | 4.564911  | -7.503497 |
| H | -5.693158 | 3.343292  | -8.449016 |
| H | -7.426761 | 3.606271  | -8.722405 |
| H | -8.918544 | 1.875511  | -5.061176 |
| H | -8.576294 | 3.603144  | -5.202014 |
| H | -9.486081 | 2.775745  | -6.481835 |
| H | -8.041387 | 0.610412  | -8.243166 |
| H | -6.308431 | 0.307281  | -8.051724 |
| H | -7.446338 | -0.213381 | -6.792089 |
| H | -7.857663 | -0.790687 | -0.237942 |
| H | -9.577656 | -0.468514 | 0.064930  |
| H | -9.090257 | -1.925302 | -0.822394 |

#### 5.4 Å-dimer of end substituted radical cation of seleno[7]helicene

|    |           |           |          |
|----|-----------|-----------|----------|
| C  | 0.000000  | 0.000000  | 0.000000 |
| Si | 0.000000  | 0.000000  | 1.882240 |
| C  | 1.768860  | 0.000000  | 2.523885 |
| C  | -0.815579 | 1.594357  | 2.522140 |
| C  | -2.102642 | 2.049369  | 2.424242 |
| Br | -3.327557 | 1.112190  | 1.301182 |
| Se | 0.237124  | 2.888472  | 3.433327 |
| C  | -1.295872 | 3.927719  | 3.546755 |
| C  | -2.430152 | 3.324553  | 3.022439 |
| C  | -3.622405 | 4.154800  | 3.142809 |
| C  | -3.289915 | 5.476332  | 3.565461 |
| Se | -1.541313 | 5.690674  | 4.183035 |
| Se | -4.696559 | 6.712765  | 3.547069 |
| C  | -5.697761 | 5.239153  | 2.922053 |
| C  | -5.032523 | 3.995120  | 2.976797 |
| C  | -5.971165 | 2.881850  | 2.806100 |
| C  | -7.182967 | 3.302245  | 2.275891 |
| Se | -7.418719 | 5.163466  | 2.255002 |
| Se | -8.390493 | 1.934600  | 1.843842 |
| C  | -7.074278 | 0.807154  | 2.544416 |
| Se | -6.978461 | -1.073579 | 2.627755 |
| C  | -5.444506 | -0.762429 | 3.688665 |
| C  | -5.157893 | 0.577032  | 3.907758 |
| C  | -5.983628 | 1.473173  | 3.124356 |
| Se | -4.273289 | -1.918555 | 4.559981 |
| C  | -3.488308 | -0.375446 | 5.370694 |
| Si | -2.108566 | -0.600339 | 6.654604 |



|    |            |           |           |
|----|------------|-----------|-----------|
| C  | -2.762723  | -0.190639 | 8.368847  |
| C  | -4.129327  | 0.737674  | 4.909876  |
| Br | -3.930900  | 2.406715  | 5.853696  |
| C  | -0.933115  | -1.476159 | 2.572780  |
| C  | -1.584030  | -2.406357 | 6.576522  |
| C  | -0.665590  | 0.507099  | 6.182795  |
| Se | -2.686889  | 6.082515  | 0.516000  |
| C  | -2.608726  | 4.491375  | -0.475135 |
| Se | -1.170594  | 3.321708  | -0.756080 |
| C  | -2.311221  | 2.517282  | -1.999578 |
| Se | -2.095053  | 0.965481  | -3.047678 |
| C  | -3.707504  | 1.518803  | -3.865736 |
| Se | -4.708538  | 0.802978  | -5.263272 |
| C  | -5.777587  | 2.386378  | -5.195313 |
| Si | -7.159129  | 2.630813  | -6.473719 |
| C  | -7.370306  | 0.986644  | -7.365379 |
| C  | -4.425661  | 6.203096  | -0.095936 |
| C  | -4.875283  | 5.075753  | -0.817103 |
| C  | -3.756701  | 4.209911  | -1.202600 |
| C  | -3.523842  | 3.193936  | -2.202264 |
| C  | -4.223927  | 2.708677  | -3.374012 |
| C  | -5.310704  | 3.189771  | -4.195872 |
| Br | -5.829474  | 5.045722  | -4.148909 |
| Se | -5.687439  | 7.595946  | 0.084372  |
| C  | -6.866780  | 6.332157  | -0.636606 |
| Se | -8.653645  | 6.538890  | -1.135952 |
| C  | -8.570577  | 4.688853  | -1.514932 |
| C  | -7.328039  | 4.101149  | -1.325194 |
| C  | -6.298467  | 5.059811  | -0.942815 |
| Se | -9.901094  | 3.501346  | -2.027315 |
| C  | -8.605127  | 2.119932  | -1.867932 |
| Si | -9.111588  | 0.314232  | -2.183510 |
| C  | -9.023308  | -0.658713 | -0.574650 |
| C  | -7.409184  | 2.666582  | -1.488476 |
| Br | -5.993385  | 1.504107  | -0.955394 |
| C  | -6.664003  | 3.970373  | -7.696338 |
| C  | -8.743019  | 3.075182  | -5.565380 |
| C  | -10.883601 | 0.350148  | -2.815348 |
| C  | -7.978033  | -0.412367 | -3.492593 |
| H  | -2.405075  | -3.082597 | 6.842374  |
| H  | -1.224539  | -2.679877 | 5.577842  |
| H  | -0.766820  | -2.583849 | 7.286358  |
| H  | 0.160572   | 0.367751  | 6.891514  |
| H  | -0.299962  | 0.263186  | 5.181069  |
| H  | -0.945197  | 1.564193  | 6.190940  |

|   |            |           |           |
|---|------------|-----------|-----------|
| H | -1.015163  | 0.054684  | -0.403315 |
| H | 0.576799   | 0.843961  | -0.395822 |
| H | 0.461849   | -0.924966 | -0.368060 |
| H | -0.903391  | -1.473842 | 3.666421  |
| H | -1.980991  | -1.483353 | 2.261621  |
| H | -0.465921  | -2.405774 | 2.223569  |
| H | 2.285872   | -0.901680 | 2.173608  |
| H | 2.336332   | 0.866994  | 2.164719  |
| H | 1.802300   | -0.001831 | 3.619619  |
| H | -3.056754  | 0.860385  | 8.450748  |
| H | -3.634671  | -0.808504 | 8.613173  |
| H | -1.988206  | -0.386552 | 9.121193  |
| H | -11.570559 | 0.798039  | -2.087209 |
| H | -10.967457 | 0.908922  | -3.754759 |
| H | -11.225705 | -0.674404 | -3.005824 |
| H | -8.266684  | -1.451304 | -3.696791 |
| H | -8.058329  | 0.150007  | -4.427584 |
| H | -6.930415  | -0.404605 | -3.180580 |
| H | -6.553914  | 4.944212  | -7.209174 |
| H | -5.713544  | 3.723711  | -8.183711 |
| H | -7.429411  | 4.065368  | -8.476983 |
| H | -9.014964  | 2.291154  | -4.852649 |
| H | -8.644681  | 4.013406  | -5.012432 |
| H | -9.566835  | 3.186616  | -6.281720 |
| H | -8.178143  | 1.068437  | -8.102883 |
| H | -6.460953  | 0.692986  | -7.902902 |
| H | -7.632751  | 0.180859  | -6.670224 |
| H | -8.013853  | -0.651287 | -0.153741 |
| H | -9.714100  | -0.251410 | 0.172712  |
| H | -9.305844  | -1.702826 | -0.759943 |

### 5.5 Å-dimer of unsubstituted of seleno[7]helicene radical cation with two PF<sub>6</sub><sup>-</sup> counter ions

|    |           |           |           |
|----|-----------|-----------|-----------|
| C  | 0.000000  | 0.000000  | 0.000000  |
| Se | 0.000000  | 0.000000  | 1.897323  |
| C  | 1.871367  | 0.000000  | 1.732316  |
| Se | 3.232982  | -0.177090 | 3.015371  |
| C  | 4.389183  | -0.010466 | 1.528468  |
| Se | 6.225249  | -0.177096 | 1.375346  |
| C  | 5.985517  | 0.285704  | -0.422972 |
| Se | 7.258864  | 0.688073  | -1.746082 |
| C  | 5.806302  | 1.385460  | -2.683032 |
| Se | 5.727414  | 2.294502  | -4.327908 |
| C  | 3.947983  | 2.690999  | -3.817212 |
| Se | 2.662072  | 3.837224  | -4.540776 |
| C  | 1.684097  | 3.531329  | -2.942007 |
| C  | 2.318112  | 2.684100  | -2.097748 |
| C  | 3.577890  | 2.175079  | -2.579128 |
| C  | 4.588747  | 1.349345  | -1.977662 |
| C  | 4.679419  | 0.609578  | -0.748595 |
| C  | 3.741516  | 0.277376  | 0.314637  |
| C  | 2.329604  | 0.144887  | 0.406625  |
| C  | 1.262480  | 0.058789  | -0.563195 |
| C  | 1.269051  | -0.075274 | -1.991847 |
| C  | 0.044312  | -0.218317 | -2.557760 |
| Se | -1.352461 | -0.199311 | -1.280857 |
| F  | 3.184988  | 3.083606  | 0.915881  |
| P  | 4.386572  | 4.149891  | 1.257134  |
| F  | 5.410137  | 3.324417  | 0.274002  |
| F  | 5.587520  | 5.221835  | 1.608570  |
| F  | 4.855251  | 3.211983  | 2.528475  |
| F  | 3.365543  | 4.979531  | 2.248758  |
| F  | 3.919207  | 5.086530  | -0.011024 |
| C  | 4.338118  | -1.385053 | -3.402405 |
| C  | 3.708666  | -0.907777 | -4.503859 |
| Se | 4.763676  | -1.052794 | -6.064232 |
| C  | 6.071137  | -1.791282 | -4.951005 |
| Se | 7.873970  | -2.259782 | -5.249531 |
| C  | 7.883421  | -2.657455 | -3.405960 |
| Se | 9.290181  | -3.191563 | -2.292068 |
| C  | 7.997597  | -3.187486 | -0.940191 |
| Se | 8.178592  | -3.571218 | 0.903299  |
| C  | 6.344221  | -3.275325 | 0.970183  |
| Se | 5.130659  | -3.465843 | 2.408290  |
| C  | 3.824876  | -3.242650 | 1.066029  |
| Se | 1.972424  | -3.254989 | 1.162270  |

|    |           |           |           |
|----|-----------|-----------|-----------|
| C  | 2.024052  | -3.440535 | -0.724619 |
| Se | 0.722248  | -3.914716 | -1.974693 |
| C  | 2.160999  | -4.204765 | -3.160451 |
| C  | 3.369704  | -3.936933 | -2.597869 |
| C  | 3.306843  | -3.476227 | -1.240751 |
| C  | 4.333684  | -3.221543 | -0.250880 |
| C  | 5.741893  | -3.081221 | -0.304226 |
| C  | 6.709865  | -2.899734 | -1.362772 |
| C  | 6.655996  | -2.496016 | -2.761047 |
| C  | 5.653659  | -1.926367 | -3.631420 |
| F  | 5.784724  | -5.993791 | -0.556182 |
| P  | 6.262834  | -6.866339 | -1.863522 |
| F  | 6.742899  | -7.747371 | -3.169419 |
| F  | 6.204574  | -5.516041 | -2.796926 |
| F  | 4.689500  | -7.185505 | -2.225672 |
| F  | 6.324361  | -8.223990 | -0.932220 |
| F  | 7.836476  | -6.548012 | -1.500482 |
| H  | 0.735039  | 4.027362  | -2.794859 |
| H  | -0.193037 | -0.322709 | -3.607061 |
| H  | 2.179810  | -0.049429 | -2.566927 |
| H  | 1.927000  | 2.441598  | -1.122130 |
| H  | 1.964068  | -4.541058 | -4.168704 |
| H  | 2.722178  | -0.474243 | -4.572694 |
| H  | 3.895128  | -1.345119 | -2.421233 |
| H  | 4.301916  | -4.093354 | -3.118670 |

### 5.6 Å-dimer of end substituted of seleno[7]helicene radical cation with two PF<sub>6</sub><sup>-</sup> counter ions

|    |           |          |          |
|----|-----------|----------|----------|
| C  | 0.000000  | 0.000000 | 0.000000 |
| Si | 0.000000  | 0.000000 | 1.881129 |
| C  | 1.759800  | 0.000000 | 2.546348 |
| C  | -0.799289 | 1.612131 | 2.476018 |
| C  | -2.095195 | 2.051437 | 2.409787 |
| Br | -3.380236 | 1.075938 | 1.385205 |
| Se | 0.296016  | 2.999078 | 3.167293 |
| C  | -1.235774 | 4.042011 | 3.265183 |
| C  | -2.392155 | 3.370484 | 2.901699 |
| C  | -3.588214 | 4.193641 | 2.985536 |
| C  | -3.261292 | 5.556522 | 3.166092 |
| Se | -1.475501 | 5.890272 | 3.570328 |
| Se | -4.700878 | 6.748495 | 2.959750 |
| C  | -5.710390 | 5.169769 | 2.723372 |

|    |           |           |           |
|----|-----------|-----------|-----------|
| C  | -5.006843 | 3.977088  | 2.942873  |
| C  | -5.896209 | 2.820279  | 3.006131  |
| C  | -7.154482 | 3.105582  | 2.494644  |
| Se | -7.479511 | 4.936472  | 2.185871  |
| Se | -8.302692 | 1.622357  | 2.334043  |
| C  | -6.895562 | 0.680328  | 3.137934  |
| Se | -6.722401 | -1.158489 | 3.510350  |
| C  | -5.106068 | -0.646520 | 4.335950  |
| C  | -4.864188 | 0.720153  | 4.336920  |
| C  | -5.805691 | 1.466271  | 3.521220  |
| Se | -3.814602 | -1.630874 | 5.249124  |
| C  | -3.037761 | 0.037334  | 5.767097  |
| Si | -1.554960 | 0.016816  | 6.946737  |
| C  | -2.109534 | 0.550652  | 8.663020  |
| C  | -3.767627 | 1.052840  | 5.218999  |
| Br | -3.587452 | 2.834775  | 5.930988  |
| C  | -0.939953 | -1.460485 | 2.601978  |
| C  | -0.927494 | -1.758517 | 6.980402  |
| C  | -0.204858 | 1.138986  | 6.282424  |
| F  | -0.232388 | 4.499888  | 0.230863  |
| P  | 0.918748  | 5.585252  | -0.240586 |
| F  | 1.644805  | 5.449045  | 1.227891  |
| F  | 2.065198  | 6.663816  | -0.709853 |
| F  | 1.834526  | 4.348141  | -0.814743 |
| F  | 0.181822  | 5.725875  | -1.702635 |
| F  | -0.009859 | 6.814996  | 0.339337  |
| Se | -3.095141 | 5.384152  | -0.129695 |
| C  | -4.748844 | 5.825454  | -0.835638 |
| Se | -5.911274 | 7.241451  | -0.417349 |
| C  | -7.016003 | 6.452312  | -1.727839 |
| Se | -8.550809 | 7.103661  | -2.535696 |
| C  | -8.519451 | 5.509237  | -3.529776 |
| Se | -9.643962 | 4.926373  | -4.920482 |
| C  | -8.637726 | 3.353344  | -4.829835 |
| Se | -8.733062 | 1.798685  | -5.879127 |
| C  | -7.499210 | 1.110123  | -4.628713 |
| Se | -6.766940 | -0.581456 | -4.426396 |
| C  | -6.050548 | 0.010857  | -2.765764 |
| Si | -5.068094 | -1.236833 | -1.730795 |
| C  | -5.224329 | -2.913134 | -2.575258 |
| C  | -5.181545 | 5.000479  | -1.908588 |
| C  | -6.536725 | 5.244453  | -2.279243 |
| C  | -7.512078 | 4.622904  | -3.176238 |
| C  | -7.685584 | 3.322604  | -3.795872 |
| C  | -7.150912 | 1.990041  | -3.609476 |

|    |            |           |           |
|----|------------|-----------|-----------|
| C  | -6.405179  | 1.318658  | -2.568396 |
| Br | -6.240516  | 2.115939  | -0.832891 |
| C  | -4.114224  | 4.124872  | -2.369873 |
| C  | -3.855022  | 3.370882  | -3.568747 |
| Br | -4.812220  | 3.736032  | -5.191799 |
| C  | -3.032797  | 4.084697  | -1.505851 |
| Se | -1.702105  | 2.905742  | -2.039217 |
| C  | -2.711587  | 2.610424  | -3.614690 |
| Si | -1.977510  | 1.501388  | -4.972700 |
| C  | -1.362704  | 2.583833  | -6.381889 |
| C  | -5.772607  | -1.368965 | 0.005885  |
| C  | -3.261069  | -0.720067 | -1.728519 |
| C  | -0.527735  | 0.595158  | -4.184052 |
| C  | -3.289403  | 0.291738  | -5.551947 |
| F  | -7.686310  | -0.772729 | -7.484765 |
| P  | -8.889814  | -1.893165 | -7.625726 |
| F  | -7.923101  | -3.013924 | -6.910490 |
| F  | -8.311824  | -2.329055 | -9.099847 |
| F  | -10.091385 | -3.005224 | -7.759488 |
| F  | -9.462397  | -1.447929 | -6.147200 |
| F  | -9.851046  | -0.761604 | -8.333502 |
| H  | -1.677409  | -2.457429 | 7.369354  |
| H  | -0.635430  | -2.091783 | 5.977357  |
| H  | -0.044084  | -1.827676 | 7.626902  |
| H  | 0.646596   | 1.144264  | 6.975080  |
| H  | 0.151193   | 0.784156  | 5.310522  |
| H  | -0.549329  | 2.169179  | 6.159222  |
| H  | -1.013411  | 0.083940  | -0.399331 |
| H  | 0.589122   | 0.843170  | -0.378346 |
| H  | 0.444370   | -0.926182 | -0.385858 |
| H  | -0.925692  | -1.423876 | 3.696943  |
| H  | -1.983948  | -1.481551 | 2.277903  |
| H  | -0.465784  | -2.399454 | 2.288643  |
| H  | 2.273504   | -0.922001 | 2.247911  |
| H  | 2.343535   | 0.843995  | 2.159988  |
| H  | 1.768773   | 0.049087  | 3.641846  |
| H  | -2.465819  | 1.586005  | 8.666020  |
| H  | -2.920393  | -0.089054 | 9.030604  |
| H  | -1.272848  | 0.477307  | 9.369316  |
| H  | 0.259271   | 1.291374  | -3.870293 |
| H  | -0.833597  | 0.010002  | -3.310245 |
| H  | -0.085130  | -0.094769 | -4.912987 |
| H  | -2.858976  | -0.402876 | -6.284392 |
| H  | -3.679338  | -0.294375 | -4.715757 |
| H  | -4.132979  | 0.801018  | -6.026602 |

|   |           |           |           |
|---|-----------|-----------|-----------|
| H | -5.744622 | -0.430730 | 0.561060  |
| H | -6.817620 | -1.698639 | -0.030403 |
| H | -5.204665 | -2.116106 | 0.573045  |
| H | -2.823230 | -0.890722 | -2.716926 |
| H | -3.129142 | 0.334499  | -1.478176 |
| H | -2.696648 | -1.318472 | -1.004464 |
| H | -4.635120 | -3.652481 | -2.018233 |
| H | -6.261905 | -3.265089 | -2.602013 |
| H | -4.842969 | -2.896204 | -3.602966 |
| H | -2.182853 | 3.121647  | -6.868004 |
| H | -0.637135 | 3.321401  | -6.019607 |
| H | -0.867194 | 1.963987  | -7.139982 |
